# Supplementary material for: A mechanistic study of Pd(OAc)2-catalyzed intramolecular C–H functionalization reaction involving CO/isonitrile insertion
Source: Royal Society of Chemistry journal article supplement (doi:10.1039/c5dt00666j), 2015-01-01
Supplement: c5dt00666j1.pdf [file c5dt00666j1.pdf]

## *Supporting Information*

### **Mechanistic study of Pd(OAc)<sub>2</sub>-catalyzed intramolecular C–H functionalization reaction involving CO/isonitrile insertion**

Honghong Gu<sup>a</sup>, Zhiping Qiu<sup>a</sup>, Zhongchao Zhang<sup>a</sup>, Juan Li<sup>\*a</sup> and Bo Yan<sup>\*b</sup>

<sup>a</sup>Department of Chemistry, Jinan University, Huangpu Road West 601, Guangzhou,  
Guangdong 510632, P.R. China

<sup>b</sup>State Key Laboratory of Organic Geochemistry, Guangzhou Institute of  
Geochemistry, Chinese Academy of Sciences, Guangzhou 510640, China

\*Corresponding authors. E-mail: tchjli@jnu.edu.cn (J. Li); [yanbo2007@gig.ac.cn](mailto:yanbo2007@gig.ac.cn) (B.  
Yan)

#### **Table of Contents**

|                                                                                |           |
|--------------------------------------------------------------------------------|-----------|
| <b>Complete Reference for Ref (20)</b> .....                                   | <b>S2</b> |
| <b>Calculated imaginary frequencies of all transition states species</b> ..... | <b>S3</b> |
| <b>Cartesian coordinates and electronic energies</b> .....                     | <b>S4</b> |

**Complete Reference for Ref (20):**

M. J. Frisch, G. W. Trucks, H. B. Schlegel, G. E. Scuseria, M. A. Robb, J. R. Cheeseman, G. Scalmani, V. Barone, B. Mennucci, G. A. Petersson, H. Nakatsuji, M. Caricato, X. Li, H. P. Hratchian, A. F. Izmaylov, J. Bloino, G. Zheng, J. L. Sonnenberg, M. Hada, M. Ehara, K. Toyota, R. Fukuda, J. Hasegawa, M. Ishida, T. Nakajima, Y. Honda, O. Kitao, H. Nakai, T. Vreven, Jr., J. A. Montgomery, J. E. Peralta, F. Ogliaro, M. Bearpark, J. J. Heyd, E. Brothers, K. N. Kudin, V. N. Staroverov, T. Keith, R. Kobayashi, J. Normand, K. Raghavachari, A. Rendell, J. C. Burant, S. S. Iyengar, J. Tomasi, M. Cossi, N. Rega, J. M. Millam, M. Klene, J. E. Knox, J. B. Cross, V. Bakken, C. Adamo, J. Jaramillo, R. Gomperts, R. E. Stratmann, O. Yazyev, A. J. Austin, R. Cammi, C. Pomelli, J. W. Ochterski, R. L. Martin, K. Morokuma, V. G. Zakrzewski, G. A. Voth, P. Salvador, J. J. Dannenberg, S. Dapprich, A. D. Daniels, O. Farkas, J. B. Foresman, J. V. Ortiz, J. Cioslowski and D. J. Fox, *Gaussian 09, Revision C.01*, Gaussian, Inc., Wallingford, CT, 2010.

## Calculated imaginary frequencies of all transition states species

---

|                                |          |
|--------------------------------|----------|
| <b>TSI</b>                     | -983.98  |
| <b>TSII<sub>CO</sub></b>       | -356.84  |
| <b>TSIII<sub>CO</sub></b>      | -214.96  |
| <b>TSIV<sub>CO</sub></b>       | -713.05  |
| <b>TSV</b>                     | -1019.75 |
| <b>TSVI</b>                    | -1004.58 |
| <b>TSVI'<sub>CO</sub></b>      | -175.78  |
| <b>TSVII<sub>CO</sub></b>      | -215.48  |
| <b>TSVIII<sub>CO</sub></b>     | -456.04  |
| <b>TSI<sub>t-BuNC</sub></b>    | -1155.38 |
| <b>TSII<sub>t-BuNC</sub></b>   | -366.60  |
| <b>TSIII<sub>t-BuNC</sub></b>  | -347.10  |
| <b>TSIV<sub>t-BuNC</sub></b>   | -882.27  |
| <b>TSV<sub>t-BuNC</sub></b>    | -569.62  |
| <b>TSVI<sub>t-BuNC</sub></b>   | -395.46  |
| <b>TSVI'<sub>t-BuNC</sub></b>  | -258.62  |
| <b>TSVII<sub>t-BuNC</sub></b>  | -381.15  |
| <b>TSVII'<sub>t-BuNC</sub></b> | -258.11  |

---

## Cartesian coordinates and electronic energies

### Sub

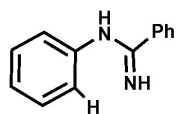

E= -612.0977065au

|   |           |           |           |
|---|-----------|-----------|-----------|
| H | -2.603798 | 1.916557  | 1.089123  |
| C | -2.883191 | 0.985101  | 0.604295  |
| C | -1.897953 | 0.230124  | -0.049397 |
| C | -4.201872 | 0.535991  | 0.656300  |
| C | -0.490736 | 0.749030  | -0.114561 |
| C | -2.262392 | -0.982976 | -0.653792 |
| C | -4.556405 | -0.671690 | 0.049608  |
| H | -4.951934 | 1.125487  | 1.176422  |
| N | 0.461207  | -0.230456 | 0.106539  |
| N | -0.173693 | 1.973828  | -0.351168 |
| C | -3.584461 | -1.427967 | -0.607737 |
| H | -1.515631 | -1.564156 | -1.188522 |
| H | -5.584777 | -1.020216 | 0.088349  |
| C | 1.866557  | -0.165811 | 0.077659  |
| H | 0.091383  | -1.111153 | 0.433770  |
| H | -3.855631 | -2.362048 | -1.092227 |
| C | 2.563193  | -1.342603 | 0.408623  |
| C | 2.592218  | 0.985337  | -0.270392 |
| C | 3.953894  | -1.372989 | 0.390009  |
| H | 2.006260  | -2.238236 | 0.679826  |
| C | 3.987268  | 0.935729  | -0.286710 |
| H | 2.055950  | 1.892456  | -0.510888 |
| C | 4.678943  | -0.231189 | 0.039831  |
| H | 4.470562  | -2.293299 | 0.649768  |
| H | 4.537781  | 1.833172  | -0.557727 |
| H | 5.764900  | -0.252325 | 0.024773  |
| H | -1.018041 | 2.513641  | -0.542677 |

### P<sub>CO</sub>

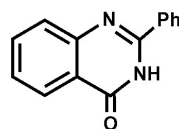

E= -724.2663726au

|   |           |           |           |
|---|-----------|-----------|-----------|
| H | 2.478213  | 1.967741  | -0.647237 |
| C | 2.878391  | 1.003232  | -0.345531 |
| C | 2.022529  | -0.058379 | -0.011041 |
| C | 4.261672  | 0.824603  | -0.343530 |
| C | 0.545920  | 0.085734  | 0.004222  |
| C | 2.581241  | -1.306099 | 0.311454  |
| C | 4.807715  | -0.415077 | -0.008129 |
| H | 4.910435  | 1.653449  | -0.612208 |
| N | -0.208713 | -0.969729 | -0.076212 |
| N | 0.026377  | 1.360478  | 0.109853  |
| C | 3.962031  | -1.480150 | 0.315622  |
| H | 1.911917  | -2.123114 | 0.556384  |
| H | 5.885479  | -0.552438 | -0.004022 |
| C | -1.582547 | -0.791483 | -0.062431 |
| H | 4.381071  | -2.448637 | 0.574240  |
| C | -2.410817 | -1.929785 | -0.145616 |
| C | -2.192055 | 0.484791  | 0.023377  |
| C | -3.790381 | -1.791978 | -0.142071 |
| H | -1.935920 | -2.903408 | -0.213332 |
| C | -3.589442 | 0.611376  | 0.026784  |
| C | -4.386873 | -0.520241 | -0.056418 |
| H | -4.418319 | -2.676700 | -0.207005 |
| H | -4.015809 | 1.607096  | 0.096637  |
| H | -5.469033 | -0.427342 | -0.055837 |
| H | 0.640108  | 2.155407  | 0.240364  |
| C | -1.340955 | 1.673040  | 0.127896  |
| O | -1.711297 | 2.834402  | 0.233625  |

**P<sub>t</sub>-BuNC**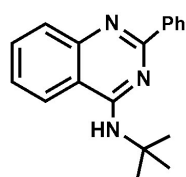

E= -861.6383137au

|   |           |           |           |
|---|-----------|-----------|-----------|
| H | 2.154691  | -1.818704 | -0.000380 |
| C | 2.872961  | -1.007104 | -0.000190 |
| C | 2.403969  | 0.315472  | -0.000047 |
| C | 4.241638  | -1.273710 | -0.000098 |
| C | 0.945371  | 0.615098  | -0.000142 |
| C | 3.337221  | 1.365379  | 0.000186  |
| C | 5.162263  | -0.223736 | 0.000142  |
| H | 4.589844  | -2.303499 | -0.000224 |
| N | 0.585666  | 1.886209  | -0.000219 |
| N | 0.107711  | -0.458048 | -0.000208 |
| C | 4.703797  | 1.096825  | 0.000284  |
| H | 2.968076  | 2.384775  | 0.000287  |
| H | 6.229160  | -0.432038 | 0.000213  |
| C | -0.753849 | 2.146223  | -0.000156 |
| H | 5.414380  | 1.919440  | 0.000479  |
| C | -1.183034 | 3.498464  | -0.000129 |
| C | -1.732939 | 1.112839  | -0.000102 |
| C | -2.526194 | 3.809493  | 0.000041  |
| H | -0.416371 | 4.266765  | -0.000214 |
| C | -3.103657 | 1.459044  | 0.000139  |
| C | -3.496934 | 2.783863  | 0.000212  |
| H | -2.843519 | 4.848930  | 0.000074  |
| H | -3.874582 | 0.692154  | 0.000315  |
| H | -4.553388 | 3.036353  | 0.000400  |
| C | -1.201380 | -0.239062 | -0.000308 |
| H | -3.036751 | -1.078549 | -0.000554 |
| N | -2.053675 | -1.299078 | -0.000602 |
| C | -1.732153 | -2.746377 | 0.000063  |
| C | -3.088979 | -3.472102 | 0.000076  |
| H | -2.936585 | -4.555642 | 0.000449  |
| H | -3.676131 | -3.216474 | 0.891132  |
| H | -3.675813 | -3.217070 | -0.891361 |
| C | -0.947226 | -3.127264 | -1.269552 |

|   |           |           |           |
|---|-----------|-----------|-----------|
| H | -1.525185 | -2.880103 | -2.167298 |
| H | 0.003296  | -2.592645 | -1.311210 |
| H | -0.747161 | -4.205079 | -1.276652 |
| C | -0.947710 | -3.126322 | 1.270248  |
| H | -1.525895 | -2.878268 | 2.167603  |
| H | -0.747896 | -4.204179 | 1.278360  |
| H | 0.002916  | -2.591876 | 1.311786  |

**CO**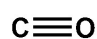

E= -113.3069138au

|   |          |          |           |
|---|----------|----------|-----------|
| O | 0.000000 | 0.000000 | 0.487597  |
| C | 0.000000 | 0.000000 | -0.650130 |

**t-BuNC**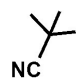

E= -250.6606398au

|   |           |           |           |
|---|-----------|-----------|-----------|
| C | 2.365635  | 0.000046  | 0.000533  |
| N | 1.187596  | 0.000046  | 0.000430  |
| C | -0.256163 | -0.000029 | -0.000062 |
| C | -0.735420 | 1.120753  | -0.941447 |
| H | -1.830225 | 1.145681  | -0.961003 |
| H | -0.370741 | 2.094929  | -0.601100 |
| H | -0.372541 | 0.952423  | -1.960186 |
| C | -0.735506 | -1.375611 | -0.500114 |
| H | -0.371567 | -1.567623 | -1.514279 |
| H | -0.372024 | -2.173829 | 0.154568  |
| H | -1.830300 | -1.405263 | -0.511075 |
| C | -0.736515 | 0.254814  | 1.440942  |
| H | -0.373256 | 1.220849  | 1.805237  |
| H | -1.831333 | 0.260176  | 1.471014  |
| H | -0.373366 | -0.527499 | 2.114697  |

**H<sub>2</sub>O**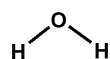

E= -76.4070235au

|   |          |          |          |
|---|----------|----------|----------|
| O | 0.000000 | 0.000000 | 0.119426 |
|---|----------|----------|----------|

|   |          |           |           |
|---|----------|-----------|-----------|
| H | 0.000000 | 0.762617  | -0.477705 |
| H | 0.000000 | -0.762617 | -0.477705 |

### CuO

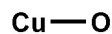

$$E = -271.2741752\text{au}$$

|    |          |          |           |
|----|----------|----------|-----------|
| Cu | 0.000000 | 0.000000 | 0.380416  |
| O  | 0.000000 | 0.000000 | -1.379008 |

### Cu<sub>2</sub>O

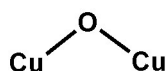

$$E = -467.4913696\text{au}$$

|    |          |           |           |
|----|----------|-----------|-----------|
| O  | 0.000000 | 0.000000  | 1.027329  |
| Cu | 0.000000 | 1.347609  | -0.141701 |
| Cu | 0.000000 | -1.347609 | -0.141701 |

### PdOAc<sub>2</sub>

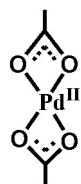

$$E = -583.7324381\text{au}$$

|    |           |           |           |
|----|-----------|-----------|-----------|
| O  | 1.762003  | -1.087590 | -0.009654 |
| O  | -1.761791 | 1.087474  | -0.009776 |
| C  | 2.435346  | 0.000106  | -0.004694 |
| O  | 1.761746  | 1.087663  | -0.009705 |
| C  | -2.435329 | -0.000151 | -0.004744 |
| O  | -1.761910 | -1.087759 | -0.009783 |
| C  | -3.931103 | 0.000187  | 0.035866  |
| H  | -4.261126 | 0.017682  | 1.081365  |
| H  | -4.319492 | 0.891686  | -0.462214 |
| H  | -4.319529 | -0.906424 | -0.433829 |
| C  | 3.931126  | 0.000249  | 0.035785  |
| H  | 4.319384  | 0.900172  | -0.446864 |
| H  | 4.261284  | -0.001414 | 1.081377  |
| H  | 4.319547  | -0.898141 | -0.449614 |
| Pd | -0.000015 | -0.000092 | -0.009395 |

### PdOAc·AcOH

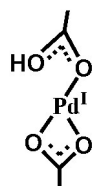

$$E = -584.3344236\text{au}$$

|    |           |           |           |
|----|-----------|-----------|-----------|
| O  | 1.084992  | 1.240827  | 0.001199  |
| O  | -1.675234 | 1.615126  | -0.002623 |
| C  | 2.211552  | 0.641659  | -0.003267 |
| O  | 2.288552  | -0.627129 | -0.006594 |
| C  | -2.409602 | 0.520283  | 0.001060  |
| O  | -1.959569 | -0.634463 | 0.004663  |
| C  | 3.477130  | 1.465695  | 0.002629  |
| H  | 3.461739  | 2.169573  | -0.835627 |
| H  | 3.522087  | 2.056443  | 0.923984  |
| H  | 4.356633  | 0.823183  | -0.064648 |
| C  | -3.888133 | 0.791003  | -0.001465 |
| H  | -4.152486 | 1.396902  | 0.871296  |
| H  | -4.153324 | 1.369834  | -0.892355 |
| H  | -4.439723 | -0.148867 | 0.012395  |
| H  | -0.696177 | 1.425869  | -0.001936 |
| Pd | 0.170557  | -0.920862 | 0.000434  |

### AcOH

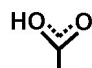

$$E = -229.0776099\text{au}$$

|   |           |           |           |
|---|-----------|-----------|-----------|
| O | 0.778567  | -1.046702 | 0.000042  |
| C | 0.092509  | 0.125642  | -0.000010 |
| O | 0.645826  | 1.201966  | -0.000035 |
| C | -1.397605 | -0.109742 | -0.000013 |
| H | -1.917514 | 0.848481  | -0.000330 |
| H | -1.685324 | -0.691726 | -0.881879 |
| H | -1.685388 | -0.691143 | 0.882221  |
| H | 1.723657  | -0.803127 | 0.000066  |

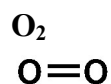

E= -150.316605au

|   |          |          |           |
|---|----------|----------|-----------|
| O | 0.000000 | 0.000000 | 0.607108  |
| O | 0.000000 | 0.000000 | -0.607108 |

**I**

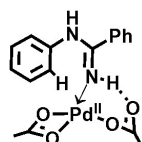

E=-1195.8645233au

|   |           |           |           |
|---|-----------|-----------|-----------|
| C | -0.877799 | -1.597260 | -1.734112 |
| C | -0.335402 | -2.263626 | -0.626931 |
| C | -1.005680 | -3.361887 | -0.077029 |
| C | -2.213335 | -3.790336 | -0.626171 |
| C | -2.767566 | -3.119212 | -1.717734 |
| C | -2.094625 | -2.024247 | -2.265074 |
| C | 1.510710  | -0.676518 | 0.031712  |
| H | -0.586180 | -3.869487 | 0.788172  |
| H | -2.723959 | -4.645649 | -0.192205 |
| H | -3.712213 | -3.447991 | -2.141170 |
| H | -2.511607 | -1.498726 | -3.119471 |
| N | 0.851659  | 0.436890  | -0.025567 |
| N | 0.931893  | -1.911237 | -0.092903 |
| C | 2.986210  | -0.683173 | 0.247387  |
| C | 3.573368  | 0.294548  | 1.066162  |
| C | 3.801296  | -1.652595 | -0.358701 |
| C | 4.950605  | 0.297647  | 1.276164  |
| H | 2.946458  | 1.040135  | 1.545472  |
| C | 5.179366  | -1.645241 | -0.145911 |
| H | 3.360550  | -2.390494 | -1.023086 |
| C | 5.755673  | -0.672272 | 0.673415  |
| H | 5.394542  | 1.054899  | 1.915722  |
| H | 5.803070  | -2.392535 | -0.628255 |
| H | 6.829372  | -0.667801 | 0.839347  |
| H | -0.351396 | -0.760169 | -2.177482 |
| O | -3.068228 | 1.218780  | 0.940394  |
| C | -2.938072 | 0.176115  | 1.660050  |

|    |           |           |           |
|----|-----------|-----------|-----------|
| O  | -1.811538 | -0.434619 | 1.639604  |
| C  | -4.067111 | -0.339004 | 2.506829  |
| H  | -4.922897 | 0.336186  | 2.449345  |
| H  | -4.358225 | -1.335572 | 2.157737  |
| H  | -3.735059 | -0.436399 | 3.545500  |
| H  | 1.387702  | 1.313338  | -0.086944 |
| H  | 1.464002  | -2.672977 | 0.304215  |
| O  | -0.883675 | 2.517730  | -0.998679 |
| C  | 0.163398  | 3.294580  | -1.034055 |
| O  | 1.248129  | 3.102035  | -0.470582 |
| C  | -0.072465 | 4.547314  | -1.870000 |
| H  | 0.869175  | 5.080071  | -2.016088 |
| H  | -0.514372 | 4.284884  | -2.835925 |
| H  | -0.784101 | 5.200172  | -1.352276 |
| Pd | -1.076275 | 0.960611  | 0.259451  |

**II**

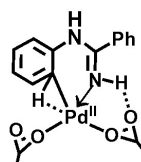

E= -1195.848611au

|   |           |           |           |
|---|-----------|-----------|-----------|
| C | -1.008245 | 1.899344  | 0.552288  |
| C | 0.133509  | 2.449228  | -0.072083 |
| C | 1.800870  | 0.614227  | 0.068463  |
| H | -3.119841 | 2.063241  | 0.837083  |
| C | -2.267810 | 2.478467  | 0.313328  |
| C | 0.001135  | 3.561331  | -0.908487 |
| C | -1.257805 | 4.119817  | -1.132445 |
| C | -2.397198 | 3.576435  | -0.532495 |
| H | 0.879876  | 3.975421  | -1.395812 |
| H | -1.346920 | 4.980594  | -1.789595 |
| H | -3.372675 | 4.017452  | -0.712165 |
| N | 1.426523  | 1.930744  | 0.171724  |
| N | 0.945933  | -0.320693 | -0.175943 |
| C | 3.254176  | 0.325160  | 0.239922  |
| C | 3.646762  | -0.871428 | 0.860261  |
| C | 4.238361  | 1.214475  | -0.219875 |
| C | 4.999279  | -1.161484 | 1.028366  |

|    |           |           |           |
|----|-----------|-----------|-----------|
| H  | 2.893259  | -1.570662 | 1.208643  |
| C  | 5.590385  | 0.918370  | -0.051548 |
| H  | 3.957875  | 2.121212  | -0.750472 |
| C  | 5.973272  | -0.267661 | 0.577775  |
| H  | 5.290976  | -2.088020 | 1.513917  |
| H  | 6.342808  | 1.608746  | -0.421841 |
| H  | 7.026773  | -0.497392 | 0.709984  |
| H  | 2.172728  | 2.603273  | 0.271322  |
| Pd | -1.076598 | -0.411653 | -0.182809 |
| O  | -3.078839 | -0.635787 | -0.228385 |
| C  | -3.641983 | -0.517843 | 0.941758  |
| C  | -5.105026 | -0.940282 | 0.954609  |
| O  | -3.070895 | -0.106287 | 1.958814  |
| H  | -5.165520 | -2.031507 | 0.873613  |
| H  | -5.577034 | -0.622749 | 1.886793  |
| H  | -5.637835 | -0.520811 | 0.095691  |
| H  | -0.912262 | 1.211081  | 1.399417  |
| O  | -1.093608 | -2.361023 | -0.792353 |
| C  | -0.117360 | -3.215048 | -0.733875 |
| O  | 1.055269  | -3.004448 | -0.388546 |
| C  | -0.556614 | -4.613796 | -1.158655 |
| H  | -1.330127 | -4.980657 | -0.476036 |
| H  | -0.995401 | -4.579462 | -2.160750 |
| H  | 0.299985  | -5.290485 | -1.147187 |
| H  | 1.299985  | -1.289132 | -0.263980 |

### III

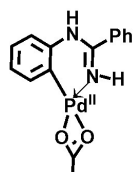

E= -966.78257au

|   |           |          |           |
|---|-----------|----------|-----------|
| C | 1.057259  | 1.402937 | -0.040255 |
| C | -0.180674 | 2.063367 | -0.098349 |
| C | -1.648626 | 0.048490 | -0.013802 |
| H | 3.182992  | 1.696382 | -0.002881 |
| C | 2.218249  | 2.192718 | -0.046159 |
| C | -0.248784 | 3.466352 | -0.167197 |

|    |           |           |           |
|----|-----------|-----------|-----------|
| C  | 0.915043  | 4.224710  | -0.173787 |
| C  | 2.156416  | 3.584825  | -0.111490 |
| H  | -1.220347 | 3.957227  | -0.213502 |
| H  | 0.852203  | 5.308032  | -0.226395 |
| H  | 3.073541  | 4.167951  | -0.115729 |
| N  | -1.419575 | 1.378639  | -0.096763 |
| N  | -0.674730 | -0.813998 | 0.049462  |
| C  | -3.076350 | -0.376404 | -0.000986 |
| C  | -3.479959 | -1.491432 | -0.751415 |
| C  | -4.026770 | 0.318714  | 0.763004  |
| C  | -4.812234 | -1.901434 | -0.738175 |
| H  | -2.753809 | -2.017981 | -1.364368 |
| C  | -5.358110 | -0.096744 | 0.775252  |
| H  | -3.717811 | 1.162331  | 1.374439  |
| C  | -5.753564 | -1.205606 | 0.024229  |
| H  | -5.116499 | -2.759474 | -1.330520 |
| H  | -6.083577 | 0.440273  | 1.379509  |
| H  | -6.791073 | -1.527155 | 0.033675  |
| H  | -2.235907 | 1.953202  | -0.252724 |
| O  | 3.415024  | -0.677902 | 0.033914  |
| C  | 3.398128  | -1.961532 | 0.086941  |
| O  | 2.293071  | -2.576899 | 0.111376  |
| C  | 4.711934  | -2.703752 | 0.125657  |
| H  | 5.337773  | -2.394707 | -0.717831 |
| H  | 5.250871  | -2.446869 | 1.044341  |
| H  | 4.542559  | -3.781556 | 0.090401  |
| H  | -0.981028 | -1.771515 | 0.188866  |
| Pd | 1.313559  | -0.549815 | 0.032189  |

### IV<sub>CO</sub>

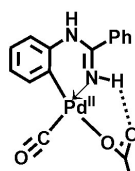

E= -1080.1129417au

|    |           |          |           |
|----|-----------|----------|-----------|
| Pd | 1.378020  | 0.558994 | -0.045172 |
| H  | -2.808681 | 1.448318 | 0.801963  |
| C  | -3.436939 | 0.623195 | 0.481154  |



|   |           |           |           |
|---|-----------|-----------|-----------|
| C | -2.850486 | -0.566415 | 0.019696  |
| C | -4.824401 | 0.747183  | 0.520101  |
| C | -1.365199 | -0.688777 | -0.010877 |
| C | -3.675731 | -1.615491 | -0.416147 |
| C | -5.640336 | -0.305251 | 0.098395  |
| H | -5.267883 | 1.670093  | 0.882153  |
| N | -0.849721 | -1.927504 | 0.187481  |
| N | -0.598271 | 0.333144  | -0.209832 |
| C | -5.063218 | -1.484957 | -0.375213 |
| H | -3.239237 | -2.521711 | -0.828370 |
| H | -6.721510 | -0.203397 | 0.130331  |
| C | 0.497374  | -2.340374 | 0.102676  |
| H | -1.511715 | -2.650063 | 0.430753  |
| H | -5.691047 | -2.299660 | -0.724649 |
| C | 0.690514  | -3.734512 | 0.154390  |
| C | 1.591729  | -1.458394 | -0.028534 |
| C | 1.959721  | -4.284625 | 0.059891  |
| H | -0.175773 | -4.386385 | 0.258512  |
| C | 2.862896  | -2.058144 | -0.139851 |
| C | 3.057435  | -3.437310 | -0.097145 |
| H | 2.088319  | -5.362404 | 0.101172  |
| H | 3.741188  | -1.433873 | -0.262579 |
| H | 4.061525  | -3.843842 | -0.180880 |
| H | -1.020013 | 1.270398  | -0.353062 |
| C | 3.255401  | 0.946280  | 0.177364  |
| O | 4.334844  | 1.279314  | 0.337649  |
| C | 0.144489  | 3.415417  | -0.139378 |
| O | -1.020684 | 2.997770  | -0.284918 |
| C | 0.398285  | 4.918794  | -0.061219 |
| H | 1.051962  | 5.226632  | -0.884701 |
| H | -0.544179 | 5.467332  | -0.115930 |
| H | 0.917390  | 5.162207  | 0.872027  |
| O | 1.218027  | 2.703346  | -0.048255 |

V<sub>CO</sub>

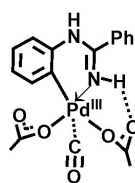

E= -1308.5420304au

|    |           |           |           |
|----|-----------|-----------|-----------|
| Pd | -1.063505 | -0.231144 | 0.119757  |
| H  | 2.850945  | -1.686003 | -0.936873 |
| C  | 3.616172  | -0.964516 | -0.667937 |
| C  | 3.248425  | 0.288655  | -0.151969 |
| C  | 4.963446  | -1.283098 | -0.827459 |
| C  | 1.804433  | 0.621358  | 0.005163  |
| C  | 4.248089  | 1.203489  | 0.215880  |
| C  | 5.953851  | -0.364474 | -0.472029 |
| H  | 5.238367  | -2.252960 | -1.231513 |
| N  | 1.450403  | 1.918948  | -0.179601 |
| N  | 0.929637  | -0.282437 | 0.308445  |
| C  | 5.593969  | 0.877452  | 0.055047  |
| H  | 3.980596  | 2.156289  | 0.665621  |
| H  | 7.002722  | -0.618383 | -0.597475 |
| C  | 0.185634  | 2.510658  | 0.035552  |
| H  | 6.359544  | 1.588520  | 0.352106  |
| C  | 0.159594  | 3.916271  | 0.079708  |
| C  | -0.998625 | 1.775799  | 0.205434  |
| C  | -1.031372 | 4.594611  | 0.304196  |
| H  | 1.086846  | 4.471576  | -0.052824 |
| C  | -2.187732 | 2.477604  | 0.441065  |
| C  | -2.211032 | 3.872464  | 0.495244  |
| H  | -1.035114 | 5.680430  | 0.336596  |
| H  | -3.111010 | 1.922938  | 0.567050  |
| H  | -3.148717 | 4.390070  | 0.678437  |
| H  | 1.210750  | -1.281365 | 0.402245  |
| C  | -1.576389 | -0.913785 | 2.739353  |
| C  | -0.246392 | -3.227314 | 0.131099  |
| O  | -1.214591 | -2.377655 | 0.116880  |
| C  | -0.687199 | -4.676855 | -0.050935 |
| H  | -1.461119 | -4.927845 | 0.681752  |
| H  | -1.130255 | -4.802468 | -1.045349 |
| H  | 0.163836  | -5.352269 | 0.057934  |

|   |           |           |           |
|---|-----------|-----------|-----------|
| O | 0.968282  | -2.971729 | 0.277595  |
| O | -1.939934 | -1.673739 | 3.501423  |
| O | -1.786983 | -0.250229 | -2.061922 |
| C | -4.139696 | -0.509520 | -2.524977 |
| H | -4.418478 | -1.569481 | -2.526584 |
| H | -4.997291 | 0.065408  | -2.165379 |
| H | -3.878778 | -0.211672 | -3.542629 |
| C | -2.967434 | -0.319801 | -1.599311 |
| O | -3.151668 | -0.252871 | -0.338489 |
| H | 2.180792  | 2.540072  | -0.496458 |

### VI<sub>CO</sub>

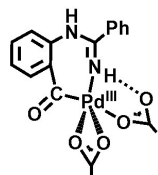

E= -1308.5496348au

|    |           |           |           |
|----|-----------|-----------|-----------|
| Pd | -1.218699 | -0.317258 | -0.086085 |
| H  | 2.673384  | -1.948299 | -1.303266 |
| C  | 3.492261  | -1.350694 | -0.915576 |
| C  | 3.225530  | -0.114987 | -0.304702 |
| C  | 4.804173  | -1.805316 | -1.027413 |
| C  | 1.815526  | 0.354085  | -0.186542 |
| C  | 4.290496  | 0.649026  | 0.199709  |
| C  | 5.860733  | -1.037185 | -0.531484 |
| H  | 5.000831  | -2.760522 | -1.505050 |
| N  | 1.646559  | 1.719074  | -0.263357 |
| N  | 0.835349  | -0.465596 | -0.036949 |
| C  | 5.601538  | 0.188002  | 0.085758  |
| H  | 4.094273  | 1.583289  | 0.718967  |
| H  | 6.882411  | -1.395647 | -0.620065 |
| C  | 0.536615  | 2.552202  | -0.031275 |
| H  | 6.417440  | 0.780043  | 0.490300  |
| C  | 0.625502  | 3.843788  | -0.583736 |
| C  | -0.582436 | 2.251322  | 0.783238  |
| C  | -0.348514 | 4.805513  | -0.351926 |
| H  | 1.482900  | 4.087586  | -1.207224 |
| C  | -1.554671 | 3.244378  | 1.016122  |
| C  | -1.450057 | 4.509674  | 0.456332  |

|   |           |           |           |
|---|-----------|-----------|-----------|
| H | -0.245491 | 5.787707  | -0.803656 |
| H | -2.401688 | 2.988313  | 1.644365  |
| H | -2.214595 | 5.255846  | 0.647415  |
| H | 1.031231  | -1.474621 | 0.143252  |
| C | -0.891905 | 0.926793  | 1.401540  |
| C | -0.571108 | -3.167386 | 0.964685  |
| O | -1.468935 | -2.239896 | 0.989796  |
| C | -1.076683 | -4.501249 | 1.513760  |
| H | -1.682317 | -4.345756 | 2.410532  |
| H | -1.713514 | -4.977438 | 0.759495  |
| H | -0.229383 | -5.154914 | 1.731747  |
| O | 0.596874  | -3.079040 | 0.541357  |
| O | -1.099826 | 0.685900  | 2.549472  |
| O | -2.366658 | -1.262972 | -1.947582 |
| C | -4.778873 | -1.081838 | -1.922649 |
| H | -5.244165 | -1.872923 | -1.323124 |
| H | -5.404925 | -0.189138 | -1.836681 |
| H | -4.724049 | -1.411261 | -2.962315 |
| C | -3.392473 | -0.810880 | -1.385303 |
| O | -3.299966 | -0.112604 | -0.301075 |
| H | 2.438598  | 2.204654  | -0.661611 |

### VII<sub>CO</sub>

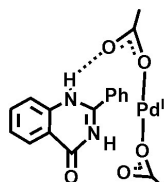

E= -1308.6097052au

|   |           |           |           |
|---|-----------|-----------|-----------|
| C | -2.622840 | -1.776678 | 0.338334  |
| C | -2.590098 | -0.414372 | 0.681751  |
| C | -0.239531 | -0.520850 | 1.099750  |
| H | -3.830871 | -3.420592 | -0.305962 |
| C | -3.836311 | -2.369374 | -0.037620 |
| C | -3.759169 | 0.361436  | 0.636601  |
| C | -4.951405 | -0.244770 | 0.262256  |
| C | -4.997402 | -1.609672 | -0.069015 |
| H | -3.708544 | 1.417379  | 0.880968  |
| H | -5.859869 | 0.349573  | 0.225274  |
| H | -5.939660 | -2.065698 | -0.357001 |

|    |           |           |           |
|----|-----------|-----------|-----------|
| N  | -1.386347 | 0.163998  | 1.090600  |
| N  | -0.225634 | -1.808372 | 0.705823  |
| C  | 1.007092  | 0.082198  | 1.627330  |
| C  | 1.169861  | 1.481284  | 1.734736  |
| C  | 2.033455  | -0.762982 | 2.097316  |
| C  | 2.345890  | 2.007813  | 2.266135  |
| H  | 0.384535  | 2.158351  | 1.417677  |
| C  | 3.197153  | -0.222625 | 2.634040  |
| H  | 1.923680  | -1.838131 | 2.050458  |
| C  | 3.362262  | 1.162228  | 2.712689  |
| H  | 2.460137  | 3.085521  | 2.333777  |
| H  | 3.975545  | -0.888273 | 2.994499  |
| H  | 4.274364  | 1.579137  | 3.130457  |
| Pd | 0.980546  | 0.745729  | -1.256601 |
| C  | -1.368812 | -2.543633 | 0.304463  |
| O  | -1.485723 | 2.737778  | 0.528905  |
| C  | -1.129501 | 3.032933  | -0.646498 |
| C  | -1.710677 | 4.287759  | -1.284472 |
| O  | -0.309972 | 2.388498  | -1.379067 |
| H  | -2.203063 | 4.027821  | -2.227388 |
| H  | -2.423023 | 4.770389  | -0.612933 |
| H  | -0.900999 | 4.984587  | -1.526581 |
| H  | 0.711791  | -2.181354 | 0.358573  |
| O  | 2.095357  | -2.467899 | -0.381889 |
| C  | 3.861868  | -2.501027 | -1.991002 |
| H  | 3.590040  | -2.721451 | -3.029482 |
| H  | 4.716736  | -1.818168 | -2.017167 |
| H  | 4.133884  | -3.429188 | -1.485107 |
| C  | 2.681027  | -1.838786 | -1.291635 |
| O  | 2.400176  | -0.667342 | -1.734290 |
| H  | -1.355762 | 1.226147  | 1.058620  |
| O  | -1.260753 | -3.702814 | -0.047527 |

## TSI

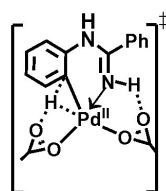

E= -1195.839426au

|    |           |           |           |
|----|-----------|-----------|-----------|
| C  | 1.332535  | -1.536138 | -0.147310 |
| C  | 0.181372  | -2.358518 | -0.077081 |
| C  | -1.620269 | -0.662840 | 0.019601  |
| H  | 3.372403  | -1.477321 | -0.828550 |
| C  | 2.484645  | -2.097848 | -0.752593 |
| C  | 0.230342  | -3.701098 | -0.479733 |
| C  | 1.396755  | -4.226264 | -1.025625 |
| C  | 2.526104  | -3.415506 | -1.188625 |
| H  | -0.661881 | -4.319115 | -0.405607 |
| H  | 1.417415  | -5.265023 | -1.343854 |
| H  | 3.430088  | -3.818856 | -1.635300 |
| N  | -1.061635 | -1.866525 | 0.372620  |
| N  | -0.912902 | 0.276814  | -0.515598 |
| C  | -3.080700 | -0.504814 | 0.271910  |
| C  | -3.583656 | 0.758110  | 0.625223  |
| C  | -3.966199 | -1.587715 | 0.149168  |
| C  | -4.946453 | 0.923716  | 0.864587  |
| H  | -2.909886 | 1.605771  | 0.703304  |
| C  | -5.328802 | -1.415112 | 0.388103  |
| H  | -3.604963 | -2.560745 | -0.174687 |
| C  | -5.820499 | -0.159967 | 0.751778  |
| H  | -5.324808 | 1.903535  | 1.140716  |
| H  | -6.005819 | -2.257542 | 0.278989  |
| H  | -6.882220 | -0.025642 | 0.938912  |
| H  | -1.701109 | -2.550736 | 0.751499  |
| Pd | 1.048407  | 0.577364  | -0.297368 |
| O  | 3.035591  | 0.945459  | 0.224247  |
| C  | 3.357873  | 0.406811  | 1.334843  |
| C  | 4.627156  | 0.900733  | 1.997718  |
| O  | 2.681189  | -0.494747 | 1.916627  |
| H  | 4.366433  | 1.719399  | 2.678808  |
| H  | 5.087096  | 0.102274  | 2.583880  |

|   |           |           |           |
|---|-----------|-----------|-----------|
| H | 5.323459  | 1.287969  | 1.251241  |
| H | 1.753901  | -0.932063 | 0.930346  |
| O | 0.893071  | 2.606045  | -0.601081 |
| C | -0.168744 | 3.319843  | -0.783355 |
| O | -1.347096 | 2.918743  | -0.826148 |
| C | 0.134449  | 4.803816  | -0.967458 |
| H | 0.717314  | 5.175906  | -0.118719 |
| H | 0.744603  | 4.944611  | -1.866215 |
| H | -0.794444 | 5.369822  | -1.061319 |
| H | -1.370067 | 1.179739  | -0.739708 |

### TSII<sub>CO</sub>

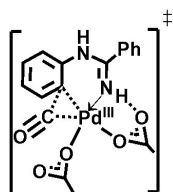

E=-1308.5147031au

|    |           |           |           |
|----|-----------|-----------|-----------|
| Pd | -1.201397 | -0.320055 | 0.293639  |
| H  | 2.894465  | -1.709206 | -1.449459 |
| C  | 3.670966  | -1.085031 | -1.017985 |
| C  | 3.314500  | 0.059272  | -0.288082 |
| C  | 5.013746  | -1.410477 | -1.195971 |
| C  | 1.869304  | 0.380411  | -0.101918 |
| C  | 4.321500  | 0.862231  | 0.270513  |
| C  | 6.012599  | -0.604278 | -0.643986 |
| H  | 5.279815  | -2.294495 | -1.767967 |
| N  | 1.565373  | 1.731227  | -0.068393 |
| N  | 0.962407  | -0.512311 | 0.018147  |
| C  | 5.664293  | 0.529104  | 0.092950  |
| H  | 4.059497  | 1.723865  | 0.879167  |
| H  | 7.058739  | -0.862237 | -0.782612 |
| C  | 0.318849  | 2.378518  | -0.022886 |
| H  | 6.436232  | 1.149019  | 0.539933  |
| C  | 0.311523  | 3.727708  | -0.424064 |
| C  | -0.901778 | 1.802321  | 0.404824  |
| C  | -0.855666 | 4.480946  | -0.406313 |
| H  | 1.239900  | 4.182440  | -0.764564 |
| C  | -2.075125 | 2.578417  | 0.412427  |

|   |           |           |           |
|---|-----------|-----------|-----------|
| C | -2.062284 | 3.907832  | 0.007784  |
| H | -0.821678 | 5.519538  | -0.722782 |
| H | -3.001920 | 2.109219  | 0.724608  |
| H | -2.978382 | 4.490151  | 0.014938  |
| H | 1.171030  | -1.523769 | 0.090429  |
| C | -0.822359 | 0.606493  | 1.907862  |
| C | -0.646415 | -3.293371 | 0.601487  |
| O | -1.544393 | -2.364836 | 0.689358  |
| C | -1.222277 | -4.693783 | 0.803791  |
| H | -1.826181 | -4.728068 | 1.715761  |
| H | -1.883869 | -4.938683 | -0.034698 |
| H | -0.415648 | -5.427774 | 0.857298  |
| O | 0.567360  | -3.155219 | 0.372685  |
| O | -0.549495 | 0.874097  | 3.000153  |
| O | -1.936719 | -0.677427 | -1.751734 |
| C | -4.242572 | -0.815744 | -2.433283 |
| H | -4.556481 | -1.862326 | -2.342896 |
| H | -5.113529 | -0.183631 | -2.241831 |
| H | -3.866835 | -0.654776 | -3.446592 |
| C | -3.157998 | -0.544710 | -1.416291 |
| O | -3.473237 | -0.217046 | -0.230169 |
| H | 2.321651  | 2.329118  | -0.371898 |

### TSIII<sub>CO</sub>

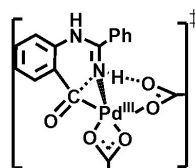

E= -1308.5398004au

|    |           |           |           |
|----|-----------|-----------|-----------|
| Pd | 1.147963  | 0.491968  | -0.088687 |
| H  | -2.611581 | 1.783557  | -0.421034 |
| C  | -3.387378 | 1.031300  | -0.524350 |
| C  | -3.088637 | -0.324316 | -0.300970 |
| C  | -4.684219 | 1.406186  | -0.867912 |
| C  | -1.701334 | -0.715798 | 0.035717  |
| C  | -4.109631 | -1.286011 | -0.405377 |
| C  | -5.691022 | 0.445093  | -0.986320 |
| H  | -4.906705 | 2.454190  | -1.044188 |

|   |           |           |           |
|---|-----------|-----------|-----------|
| N | -1.298207 | -1.971131 | -0.298585 |
| N | -0.853077 | 0.073933  | 0.642887  |
| C | -5.403512 | -0.901062 | -0.747902 |
| H | -3.910354 | -2.329741 | -0.176277 |
| H | -6.700311 | 0.744586  | -1.254211 |
| C | -0.098055 | -2.588614 | 0.075665  |
| H | -6.188078 | -1.648928 | -0.816068 |
| C | 0.160042  | -3.870169 | -0.439930 |
| C | 0.814740  | -2.012302 | 0.990532  |
| C | 1.292199  | -4.573100 | -0.054471 |
| H | -0.542635 | -4.311021 | -1.143348 |
| C | 1.945050  | -2.755800 | 1.386045  |
| C | 2.189534  | -4.018143 | 0.868310  |
| H | 1.475341  | -5.559259 | -0.470408 |
| H | 2.629680  | -2.302514 | 2.095175  |
| H | 3.072869  | -4.569559 | 1.174137  |
| H | -1.143376 | 1.036522  | 0.974308  |
| C | 0.693526  | -0.644976 | 1.555399  |
| C | 0.061502  | 3.129347  | 1.131976  |
| O | 1.114562  | 2.528908  | 0.720344  |
| C | 0.292277  | 4.565325  | 1.593062  |
| H | 1.085818  | 5.040518  | 1.011761  |
| H | -0.636728 | 5.135436  | 1.517238  |
| H | 0.604580  | 4.549503  | 2.644067  |
| O | -1.096779 | 2.650598  | 1.216153  |
| O | 0.861872  | -0.262207 | 2.675762  |
| O | 1.924023  | 1.153326  | -2.336122 |
| C | 4.320243  | 1.355065  | -2.581709 |
| H | 4.693897  | 2.323028  | -2.227848 |
| H | 5.099387  | 0.611276  | -2.391444 |
| H | 4.113020  | 1.425194  | -3.651593 |
| C | 3.055175  | 1.009440  | -1.821794 |
| O | 3.203115  | 0.586219  | -0.609657 |
| H | -1.899488 | -2.496449 | -0.918435 |

### TSIV<sub>CO</sub>

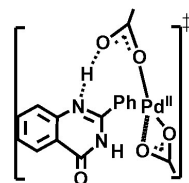

E= -1308.6109479au

|    |           |           |           |
|----|-----------|-----------|-----------|
| C  | -2.421751 | -0.674025 | 1.467323  |
| C  | -1.426353 | 0.305643  | 1.661008  |
| C  | 0.291063  | -1.221367 | 1.152816  |
| H  | -4.515912 | -1.121141 | 1.480181  |
| C  | -3.774094 | -0.345617 | 1.640007  |
| C  | -1.793290 | 1.610389  | 2.032882  |
| C  | -3.136507 | 1.916970  | 2.203002  |
| C  | -4.131181 | 0.943474  | 2.007714  |
| H  | -1.019803 | 2.356397  | 2.180477  |
| H  | -3.419273 | 2.925771  | 2.490076  |
| H  | -5.176845 | 1.202076  | 2.143589  |
| N  | -0.077445 | -0.000313 | 1.470852  |
| N  | -0.630297 | -2.210125 | 1.050457  |
| C  | 1.712225  | -1.567433 | 0.950535  |
| C  | 2.690759  | -1.053174 | 1.815463  |
| C  | 2.079486  | -2.429545 | -0.096326 |
| C  | 4.024624  | -1.418310 | 1.644813  |
| H  | 2.406001  | -0.377833 | 2.614995  |
| C  | 3.417226  | -2.782432 | -0.260915 |
| H  | 1.328634  | -2.743058 | -0.815017 |
| C  | 4.388513  | -2.285783 | 0.611997  |
| H  | 4.779323  | -1.027001 | 2.320755  |
| H  | 3.702992  | -3.434068 | -1.081456 |
| H  | 5.429913  | -2.566894 | 0.481603  |
| Pd | 0.035360  | 1.294624  | -1.732767 |
| C  | -2.028745 | -2.032756 | 1.082977  |
| O  | 1.483425  | 1.933426  | 1.504106  |
| C  | 1.802424  | 2.654010  | 0.491676  |
| C  | 2.818695  | 3.747553  | 0.763631  |
| O  | 1.372937  | 2.532715  | -0.680721 |
| H  | 2.552743  | 4.289908  | 1.675726  |
| H  | 3.799860  | 3.288054  | 0.931474  |
| H  | 2.885242  | 4.433321  | -0.082287 |

|   |           |           |           |
|---|-----------|-----------|-----------|
| H | -0.323035 | -3.129414 | 0.753681  |
| O | -0.328670 | -1.289164 | -1.668627 |
| C | -1.943138 | -2.035333 | -3.289131 |
| H | -2.498495 | -2.613669 | -2.542862 |
| H | -2.635850 | -1.594393 | -4.008413 |
| H | -1.273289 | -2.729866 | -3.808614 |
| C | -1.121129 | -0.967992 | -2.590378 |
| O | -1.269691 | 0.245515  | -2.971504 |
| H | 0.712326  | 0.944840  | 1.405706  |
| O | -2.770485 | -2.968533 | 0.839742  |

### TSV

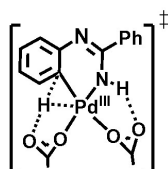

E= -1195.1894272au

|   |           |           |           |
|---|-----------|-----------|-----------|
| C | 1.306803  | -1.527382 | -0.154789 |
| C | 0.137197  | -2.362454 | -0.294337 |
| C | -1.607793 | -0.735146 | -0.146318 |
| H | 3.417885  | -1.424077 | -0.543859 |
| C | 2.529787  | -2.042935 | -0.630523 |
| C | 0.298724  | -3.709738 | -0.747079 |
| C | 1.522315  | -4.175200 | -1.188876 |
| C | 2.645677  | -3.330856 | -1.153873 |
| H | -0.592327 | -4.327257 | -0.789940 |
| H | 1.614220  | -5.189479 | -1.566713 |
| H | 3.608981  | -3.689430 | -1.505139 |
| N | -1.147182 | -2.007495 | -0.084790 |
| N | -0.886748 | 0.264258  | -0.613425 |
| C | -3.035631 | -0.537765 | 0.232247  |
| C | -3.545865 | 0.749613  | 0.475035  |
| C | -3.882804 | -1.649487 | 0.373304  |
| C | -4.880615 | 0.914573  | 0.840152  |
| H | -2.908094 | 1.623911  | 0.386939  |
| C | -5.215352 | -1.476861 | 0.740329  |
| H | -3.482686 | -2.639334 | 0.188171  |
| C | -5.718829 | -0.194882 | 0.973152  |
| H | -5.263622 | 1.913857  | 1.026437  |

|    |           |           |           |
|----|-----------|-----------|-----------|
| H  | -5.862142 | -2.343985 | 0.842313  |
| H  | -6.758507 | -0.060994 | 1.259768  |
| Pd | 1.040764  | 0.570120  | -0.311566 |
| O  | 2.926263  | 0.965644  | 0.485221  |
| C  | 3.112615  | 0.400300  | 1.616312  |
| C  | 4.277680  | 0.897751  | 2.445596  |
| O  | 2.382543  | -0.524697 | 2.082626  |
| H  | 3.943698  | 1.767281  | 3.023756  |
| H  | 4.610772  | 0.125019  | 3.140732  |
| H  | 5.095673  | 1.220304  | 1.797779  |
| H  | 1.590761  | -0.956362 | 0.984082  |
| O  | 0.935045  | 2.584433  | -0.692996 |
| C  | -0.117577 | 3.309417  | -0.906268 |
| O  | -1.298113 | 2.920280  | -0.923281 |
| C  | 0.209485  | 4.775038  | -1.164635 |
| H  | 0.823911  | 5.172680  | -0.350738 |
| H  | 0.794946  | 4.862314  | -2.086441 |
| H  | -0.711214 | 5.354033  | -1.258593 |
| H  | -1.340663 | 1.179435  | -0.798166 |

### VIII

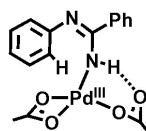

E= -1195.221434au

|   |           |           |           |
|---|-----------|-----------|-----------|
| C | 0.405064  | -1.742213 | 1.642010  |
| C | 0.100201  | -2.295944 | 0.354077  |
| C | 0.781847  | -3.489318 | -0.047950 |
| C | 1.724656  | -4.074521 | 0.775197  |
| C | 2.013118  | -3.510859 | 2.030345  |
| C | 1.344049  | -2.350646 | 2.455656  |
| C | -1.421009 | -0.580942 | -0.358237 |
| H | 0.539171  | -3.899732 | -1.022462 |
| H | 2.242444  | -4.973860 | 0.454258  |
| H | 2.749856  | -3.977683 | 2.677785  |
| H | 1.563545  | -1.928660 | 3.432236  |
| N | -0.751819 | 0.531137  | -0.314863 |
| N | -0.818730 | -1.806373 | -0.488696 |
| C | -2.912573 | -0.588233 | -0.389427 |

|    |           |           |           |    |           |           |           |
|----|-----------|-----------|-----------|----|-----------|-----------|-----------|
| C  | -3.646162 | 0.508519  | 0.095680  | C  | -1.984544 | 2.460010  | 0.635888  |
| C  | -3.595847 | -1.709444 | -0.887714 | C  | -0.065509 | 3.424533  | -1.176490 |
| C  | -5.038801 | 0.479785  | 0.070625  | C  | -1.342403 | 3.961700  | -1.158821 |
| H  | -3.137274 | 1.379642  | 0.497953  | C  | -2.310422 | 3.480003  | -0.261124 |
| C  | -4.989032 | -1.727985 | -0.913252 | H  | 0.694949  | 3.787686  | -1.859641 |
| H  | -3.024861 | -2.550751 | -1.263982 | H  | -1.593935 | 4.769414  | -1.840401 |
| C  | -5.713807 | -0.634798 | -0.434163 | H  | -3.301808 | 3.921975  | -0.243074 |
| H  | -5.597471 | 1.330954  | 0.449204  | N  | 1.538114  | 1.865920  | -0.409000 |
| H  | -5.508177 | -2.595969 | -1.310121 | N  | 0.938754  | -0.371446 | -0.202624 |
| H  | -6.800190 | -0.650742 | -0.452603 | C  | 3.272146  | 0.273471  | 0.176666  |
| H  | -0.121049 | -0.854963 | 1.975337  | C  | 3.652651  | -0.980368 | 0.684757  |
| O  | 3.293371  | 1.167147  | -0.555385 | C  | 4.253837  | 1.254990  | -0.037535 |
| C  | 3.294444  | 0.050291  | -1.167980 | C  | 4.992193  | -1.244573 | 0.962216  |
| O  | 2.177464  | -0.565545 | -1.294947 | H  | 2.911613  | -1.751110 | 0.872917  |
| C  | 4.554277  | -0.517362 | -1.755490 | C  | 5.591370  | 0.983753  | 0.241558  |
| H  | 5.421868  | -0.174941 | -1.186590 | H  | 3.955472  | 2.220206  | -0.430333 |
| H  | 4.507312  | -1.608941 | -1.769425 | C  | 5.964473  | -0.266099 | 0.741104  |
| H  | 4.658507  | -0.164662 | -2.788490 | H  | 5.274882  | -2.216768 | 1.355351  |
| H  | -1.277424 | 1.419329  | -0.308590 | H  | 6.343098  | 1.748488  | 0.067240  |
| O  | 0.851792  | 2.706984  | 0.709302  | H  | 7.007807  | -0.476511 | 0.959895  |
| C  | -0.238692 | 3.415293  | 0.737220  | Pd | -1.059824 | -0.339714 | -0.211377 |
| O  | -1.330928 | 3.121378  | 0.229497  | O  | -3.064533 | -0.450944 | -0.159825 |
| C  | -0.057787 | 4.733258  | 1.480441  | C  | -3.594086 | -0.393479 | 1.033892  |
| H  | -1.025130 | 5.221336  | 1.613947  | C  | -5.078415 | -0.728016 | 1.050278  |
| H  | 0.418325  | 4.561231  | 2.450447  | O  | -2.972910 | -0.102759 | 2.060892  |
| H  | 0.604592  | 5.387811  | 0.903251  | H  | -5.206472 | -1.804392 | 0.889439  |
| Pd | 1.200490  | 0.995179  | -0.294722 | H  | -5.511175 | -0.455340 | 2.015047  |

## IX

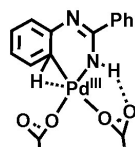

E= -1195.2026657au

|   |           |          |           |   |          |           |           |
|---|-----------|----------|-----------|---|----------|-----------|-----------|
| C | -0.718068 | 1.856262 | 0.606402  | H | 0.034119 | -5.285557 | -1.141358 |
| C | 0.277837  | 2.341572 | -0.319372 | H | 1.239004 | -1.364364 | -0.194511 |
| C | 1.845604  | 0.578730 | -0.113872 |   |          |           |           |
| H | -2.694468 | 2.111590 | 1.377240  |   |          |           |           |

**X**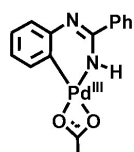

E= -966.1382495au

|    |           |           |           |
|----|-----------|-----------|-----------|
| C  | 1.016635  | 1.405648  | -0.046179 |
| C  | -0.276547 | 2.033204  | -0.045524 |
| C  | -1.642566 | 0.085312  | 0.047362  |
| H  | 3.135104  | 1.741518  | -0.093698 |
| C  | 2.155940  | 2.211002  | -0.094155 |
| C  | -0.342403 | 3.469339  | -0.087552 |
| C  | 0.797474  | 4.238341  | -0.135370 |
| C  | 2.057345  | 3.606110  | -0.140641 |
| H  | -1.333077 | 3.912909  | -0.085786 |
| H  | 0.729806  | 5.321817  | -0.169596 |
| H  | 2.963499  | 4.205575  | -0.179037 |
| N  | -1.483133 | 1.429153  | -0.011931 |
| N  | -0.653130 | -0.772802 | 0.159461  |
| C  | -3.054487 | -0.393500 | 0.000869  |
| C  | -3.374984 | -1.682468 | -0.456445 |
| C  | -4.091299 | 0.458065  | 0.414319  |
| C  | -4.698982 | -2.117142 | -0.478188 |
| H  | -2.596924 | -2.340708 | -0.834915 |
| C  | -5.413143 | 0.018128  | 0.398959  |
| H  | -3.840664 | 1.459413  | 0.744646  |
| C  | -5.721409 | -1.270197 | -0.044453 |
| H  | -4.932385 | -3.112746 | -0.844783 |
| H  | -6.205074 | 0.683565  | 0.731418  |
| H  | -6.753445 | -1.609573 | -0.061525 |
| O  | 3.408221  | -0.636297 | -0.058868 |
| C  | 3.410059  | -1.920839 | 0.027689  |
| O  | 2.313560  | -2.542331 | 0.129925  |
| C  | 4.730541  | -2.647910 | 0.012316  |
| H  | 5.304816  | -2.354836 | -0.872505 |
| H  | 5.316545  | -2.360356 | 0.892272  |
| H  | 4.571811  | -3.727733 | 0.015071  |
| H  | -0.942883 | -1.739113 | 0.292939  |
| Pd | 1.314118  | -0.526168 | 0.057093  |

**XI**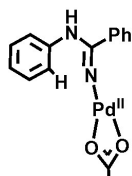

E= -966.7254719au

|   |           |           |           |
|---|-----------|-----------|-----------|
| H | 1.204776  | 1.318310  | 1.713185  |
| C | 0.985476  | 2.090819  | 0.984186  |
| C | -0.070954 | 1.909201  | 0.081212  |
| C | 1.742384  | 3.260982  | 0.947132  |
| C | -0.897451 | 0.657651  | 0.123712  |
| C | -0.352850 | 2.908693  | -0.863333 |
| C | 1.457337  | 4.254678  | 0.008120  |
| H | 2.556175  | 3.395787  | 1.653815  |
| N | -2.261298 | 0.891370  | 0.091323  |
| N | -0.372908 | -0.510262 | 0.172957  |
| C | 0.410906  | 4.075374  | -0.899124 |
| H | -1.153353 | 2.760711  | -1.583346 |
| H | 2.051051  | 5.164273  | -0.019384 |
| C | -3.346237 | -0.002332 | 0.041100  |
| H | -2.513324 | 1.862720  | 0.209980  |
| H | 0.192012  | 4.840036  | -1.639359 |
| C | -4.636161 | 0.557279  | 0.079002  |
| C | -3.205532 | -1.394595 | -0.058352 |
| C | -5.761826 | -0.257322 | 0.014010  |
| H | -4.751853 | 1.636889  | 0.156968  |
| C | -4.345290 | -2.197969 | -0.125693 |
| H | -2.217438 | -1.833765 | -0.077189 |
| C | -5.624910 | -1.643988 | -0.090470 |
| H | -6.749218 | 0.195511  | 0.044765  |
| H | -4.221859 | -3.274964 | -0.203429 |
| H | -6.503083 | -2.280991 | -0.140892 |
| O | 3.168231  | -2.432608 | -0.087568 |
| C | 3.800246  | -1.338276 | -0.181698 |
| O | 3.131621  | -0.244488 | -0.132541 |
| C | 5.291218  | -1.295400 | -0.375862 |
| H | 5.738483  | -2.241171 | -0.062840 |
| H | 5.511483  | -1.134982 | -1.437767 |



|    |          |           |          |
|----|----------|-----------|----------|
| H  | 5.722655 | -0.462259 | 0.185440 |
| Pd | 1.315130 | -1.319693 | 0.065376 |

## XII

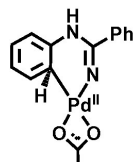

E= -966.73264au

|   |           |           |           |
|---|-----------|-----------|-----------|
| O | 1.863747  | -2.466253 | -0.304469 |
| C | 3.066795  | -2.047695 | -0.309650 |
| O | 3.307492  | -0.829487 | -0.014913 |
| C | 4.189578  | -2.978177 | -0.691487 |
| H | 4.254069  | -3.034130 | -1.784704 |
| H | 5.141101  | -2.606308 | -0.304739 |
| H | 3.989635  | -3.984941 | -0.315362 |
| H | -2.699342 | -2.315345 | -0.055546 |
| C | -3.460028 | -1.541831 | -0.051022 |
| C | -3.049088 | -0.199479 | -0.008346 |
| C | -4.814198 | -1.861599 | -0.085168 |
| C | -1.589099 | 0.110570  | 0.030565  |
| C | -4.022445 | 0.811834  | 0.003143  |
| C | -5.779266 | -0.849054 | -0.079228 |
| H | -5.119893 | -2.903784 | -0.121751 |
| N | -1.248019 | 1.412774  | -0.434610 |
| N | -0.745594 | -0.756848 | 0.440520  |
| C | -5.379869 | 0.486897  | -0.032628 |
| H | -3.720697 | 1.853296  | 0.068914  |
| H | -6.835796 | -1.101687 | -0.109552 |
| C | 0.017218  | 1.930238  | -0.231638 |
| H | -1.762629 | 1.752744  | -1.238051 |
| H | -6.123466 | 1.279327  | -0.016827 |
| C | 0.592311  | 2.826991  | -1.153042 |
| C | 0.738862  | 1.595783  | 0.958318  |
| C | 1.852612  | 3.357587  | -0.912942 |
| H | 0.050801  | 3.085606  | -2.059376 |
| C | 2.021351  | 2.167879  | 1.169744  |
| C | 2.587612  | 3.020283  | 0.237337  |
| H | 2.284853  | 4.034853  | -1.644868 |

|    |          |           |          |
|----|----------|-----------|----------|
| H  | 2.549344 | 1.925126  | 2.087016 |
| H  | 3.579017 | 3.432200  | 0.393435 |
| H  | 0.185563 | 1.209693  | 1.812723 |
| Pd | 1.195190 | -0.474643 | 0.276927 |

## XIII

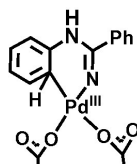

E= -1195.1768083au

|   |           |           |           |
|---|-----------|-----------|-----------|
| O | 3.051970  | -0.290339 | 1.970602  |
| C | 3.612202  | -0.710628 | 0.952865  |
| O | 3.051235  | -0.784809 | -0.224185 |
| C | 5.055118  | -1.196404 | 0.965355  |
| H | 5.071972  | -2.283647 | 0.830033  |
| H | 5.617712  | -0.757416 | 0.135460  |
| H | 5.525618  | -0.943944 | 1.917802  |
| H | -3.133221 | -1.530920 | -0.695091 |
| C | -3.761878 | -0.777674 | -0.235354 |
| C | -3.185935 | 0.431548  | 0.186464  |
| C | -5.120598 | -1.004053 | -0.030436 |
| C | -1.741456 | 0.686865  | -0.049211 |
| C | -3.981887 | 1.394398  | 0.829063  |
| C | -5.914195 | -0.038446 | 0.595294  |
| H | -5.561544 | -1.940724 | -0.359321 |
| N | -1.353085 | 2.036926  | -0.097102 |
| N | -0.875691 | -0.226717 | -0.262110 |
| C | -5.341329 | 1.158235  | 1.029788  |
| H | -3.534224 | 2.311343  | 1.200860  |
| H | -6.973715 | -0.221885 | 0.751667  |
| C | -0.019571 | 2.442433  | -0.246198 |
| H | -2.043413 | 2.648827  | -0.517931 |
| H | -5.948570 | 1.904869  | 1.533723  |
| C | 0.288143  | 3.488075  | -1.124716 |
| C | 1.016854  | 1.842686  | 0.518833  |
| C | 1.603048  | 3.933916  | -1.247354 |
| H | -0.500144 | 3.940966  | -1.721033 |
| C | 2.335467  | 2.323395  | 0.384261  |

|    |           |           |           |
|----|-----------|-----------|-----------|
| C  | 2.634764  | 3.349661  | -0.504719 |
| H  | 1.823343  | 4.742571  | -1.939074 |
| H  | 3.094788  | 1.877832  | 1.015509  |
| H  | 3.654322  | 3.706753  | -0.608684 |
| H  | 0.775740  | 1.244628  | 1.400397  |
| Pd | 1.062708  | -0.469383 | -0.196649 |
| O  | -1.276290 | -2.645885 | -0.065715 |
| C  | -0.202601 | -3.081470 | -0.502056 |
| O  | 0.907458  | -2.434944 | -0.671494 |
| C  | -0.089042 | -4.548359 | -0.918411 |
| H  | -1.015568 | -5.076849 | -0.688169 |
| H  | 0.114215  | -4.604573 | -1.992901 |
| H  | 0.751946  | -5.014941 | -0.397409 |

|    |           |           |           |
|----|-----------|-----------|-----------|
| H  | -3.593826 | 1.193617  | 1.418597  |
| C  | -5.655312 | -1.217961 | 0.193196  |
| H  | -5.078566 | -2.740896 | -1.222399 |
| H  | -5.927249 | 0.396450  | 1.598987  |
| H  | -6.677033 | -1.575833 | 0.284456  |
| H  | -2.190014 | 2.126553  | -0.139443 |
| O  | 3.314862  | -0.773641 | 0.174827  |
| C  | 3.262279  | -2.054625 | 0.233443  |
| O  | 2.140578  | -2.633517 | 0.143519  |
| C  | 4.537521  | -2.836991 | 0.417270  |
| H  | 5.259839  | -2.555400 | -0.355725 |
| H  | 4.981803  | -2.587708 | 1.387247  |
| H  | 4.338358  | -3.909222 | 0.370939  |
| Pd | 1.209144  | -0.601406 | -0.088455 |

#### XIV

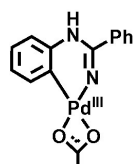

E= -966.1183409au

|   |           |           |           |
|---|-----------|-----------|-----------|
| C | 1.069009  | 1.389545  | -0.068507 |
| C | -0.123871 | 2.133379  | -0.055607 |
| C | -1.619910 | 0.175957  | -0.178565 |
| H | 3.211985  | 1.531919  | -0.101685 |
| C | 2.282353  | 2.091603  | -0.090455 |
| C | -0.096349 | 3.540440  | -0.048868 |
| C | 1.117721  | 4.213401  | -0.051062 |
| C | 2.312676  | 3.486965  | -0.071651 |
| H | -1.031981 | 4.097329  | -0.046036 |
| H | 1.132061  | 5.299574  | -0.042133 |
| H | 3.267643  | 4.005461  | -0.069409 |
| N | -1.387471 | 1.517419  | -0.037880 |
| N | -0.669701 | -0.652561 | -0.451587 |
| C | -3.024166 | -0.293955 | -0.045774 |
| C | -3.445969 | -1.418114 | -0.772836 |
| C | -3.925440 | 0.353987  | 0.813600  |
| C | -4.756454 | -1.874175 | -0.652359 |
| H | -2.740217 | -1.914224 | -1.430781 |
| C | -5.236883 | -0.106070 | 0.927476  |

#### TSVI

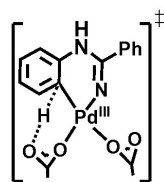

E= -1195.1610315au

|   |           |           |           |
|---|-----------|-----------|-----------|
| O | 2.189342  | 0.324493  | 1.951304  |
| C | 2.940910  | -0.480163 | 1.326107  |
| O | 2.835745  | -0.742573 | 0.077664  |
| C | 4.025888  | -1.209473 | 2.083103  |
| H | 3.637587  | -2.207119 | 2.319111  |
| H | 4.913068  | -1.332063 | 1.457251  |
| H | 4.270479  | -0.690498 | 3.011387  |
| H | -3.312380 | -0.837667 | -1.758459 |
| C | -3.795539 | -0.574969 | -0.823191 |
| C | -3.108383 | 0.228980  | 0.100325  |
| C | -5.085529 | -1.013584 | -0.536210 |
| C | -1.730797 | 0.684120  | -0.212227 |
| C | -3.719687 | 0.571814  | 1.317049  |
| C | -5.697252 | -0.660236 | 0.669935  |
| H | -5.615857 | -1.630334 | -1.255901 |
| N | -1.334881 | 1.902112  | 0.303568  |
| N | -0.961547 | -0.013080 | -0.980250 |
| C | -5.011660 | 0.128689  | 1.596300  |

|    |           |           |           |   |           |           |           |
|----|-----------|-----------|-----------|---|-----------|-----------|-----------|
| H  | -3.173297 | 1.148265  | 2.058237  | H | -0.670277 | -0.214371 | 2.302860  |
| H  | -6.703573 | -1.005022 | 0.890405  | C | -0.273101 | -1.224803 | 2.296833  |
| C  | -0.090168 | 2.495350  | 0.026467  | C | 0.757541  | -1.552484 | 1.405153  |
| H  | -2.091275 | 2.535334  | 0.535232  | C | -0.779331 | -2.183105 | 3.174576  |
| H  | -5.476670 | 0.389325  | 2.542633  | C | 1.317041  | -0.520819 | 0.457475  |
| C  | -0.062874 | 3.877682  | -0.206138 | C | 1.274935  | -2.856258 | 1.410942  |
| C  | 1.092984  | 1.716321  | -0.040852 | C | -0.267020 | -3.483050 | 3.167051  |
| C  | 1.126512  | 4.496061  | -0.577701 | H | -1.572770 | -1.914551 | 3.867103  |
| H  | -0.980754 | 4.457842  | -0.139777 | N | 2.697506  | -0.367519 | 0.636782  |
| C  | 2.269702  | 2.380535  | -0.466203 | N | 0.671584  | 0.143503  | -0.426169 |
| C  | 2.297182  | 3.743954  | -0.732226 | C | 0.758959  | -3.817783 | 2.281621  |
| H  | 1.134937  | 5.566072  | -0.766329 | H | 2.064435  | -3.120534 | 0.712810  |
| H  | 3.184316  | 1.798777  | -0.533187 | H | -0.666522 | -4.230464 | 3.847298  |
| H  | 3.220502  | 4.226343  | -1.038867 | C | 3.623629  | 0.430013  | -0.048935 |
| H  | 1.425824  | 0.962366  | 0.962549  | H | 3.067855  | -0.853254 | 1.441294  |
| Pd | 0.907106  | -0.384369 | -0.611189 | H | 1.155982  | -4.829283 | 2.263711  |
| O  | 0.857335  | -2.307292 | -1.271483 | C | 4.945512  | 0.444715  | 0.436896  |
| C  | 0.858392  | -3.195796 | -0.307574 | C | 3.307730  | 1.193223  | -1.186319 |
| O  | 0.818417  | -2.948276 | 0.895665  | C | 5.927360  | 1.198816  | -0.197424 |
| C  | 0.930451  | -4.625752 | -0.838356 | H | 5.199330  | -0.143746 | 1.317273  |
| H  | 1.904158  | -4.792676 | -1.312368 | C | 4.305993  | 1.942713  | -1.810847 |
| H  | 0.799918  | -5.331779 | -0.015648 | H | 2.290937  | 1.186516  | -1.555133 |
| H  | 0.163658  | -4.791444 | -1.601636 | C | 5.615689  | 1.956487  | -1.329568 |

**II<sub>t</sub>-BuNC**

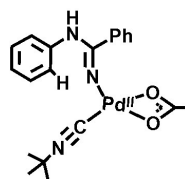

**E= -1217.4385921au**

|    |           |           |           |   |           |          |           |
|----|-----------|-----------|-----------|---|-----------|----------|-----------|
| O  | -0.911010 | -2.313502 | -1.762110 | H | -0.805811 | 3.755444 | 2.190046  |
| C  | -2.149498 | -2.370337 | -2.069045 | H | -0.498533 | 4.434244 | 0.578479  |
| O  | -2.919308 | -1.409587 | -1.742648 | C | -3.114038 | 4.391129 | -0.356496 |
| C  | -2.680017 | -3.561577 | -2.825086 | H | -2.379834 | 4.511420 | -1.158849 |
| H  | -2.355801 | -4.485309 | -2.335881 | H | -3.987091 | 3.867584 | -0.757885 |
| H  | -3.769775 | -3.526686 | -2.881498 | H | -3.427232 | 5.384227 | -0.018418 |
| H  | -2.263107 | -3.562254 | -3.838530 | C | -3.548596 | 3.410129 | 1.943686  |
| Pd | -1.194031 | -0.401342 | -0.849136 | H | -3.123964 | 2.835145 | 2.772467  |

|   |           |          |          |
|---|-----------|----------|----------|
| H | -3.869533 | 4.384605 | 2.325554 |
| H | -4.426428 | 2.878414 | 1.563830 |

### III<sub>t-BuNC</sub>

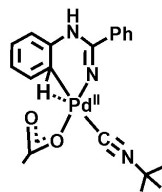

E= -1217.4231685au

|    |           |           |           |
|----|-----------|-----------|-----------|
| C  | -0.364896 | -2.431064 | 0.441575  |
| C  | -1.232315 | -2.310540 | -0.680763 |
| C  | -2.156688 | -0.119582 | -0.004337 |
| H  | 1.247091  | -3.522516 | 1.337957  |
| C  | 0.603318  | -3.459599 | 0.467672  |
| C  | -1.089544 | -3.216712 | -1.749811 |
| C  | -0.119970 | -4.209945 | -1.698616 |
| C  | 0.741011  | -4.336588 | -0.597198 |
| H  | -1.740349 | -3.128957 | -2.616545 |
| H  | -0.023899 | -4.893386 | -2.538726 |
| H  | 1.498687  | -5.113455 | -0.580819 |
| N  | -2.233994 | -1.359493 | -0.702415 |
| N  | -1.096474 | 0.434040  | 0.433192  |
| C  | -3.491260 | 0.537483  | 0.187722  |
| C  | -3.546104 | 1.924097  | 0.401859  |
| C  | -4.690721 | -0.191368 | 0.172225  |
| C  | -4.767858 | 2.564478  | 0.586896  |
| H  | -2.612087 | 2.475251  | 0.424489  |
| C  | -5.915929 | 0.452572  | 0.358925  |
| H  | -4.665682 | -1.269435 | 0.043064  |
| C  | -5.959262 | 1.831750  | 0.562992  |
| H  | -4.794510 | 3.639141  | 0.748271  |
| H  | -6.835039 | -0.127634 | 0.352062  |
| H  | -6.912767 | 2.333333  | 0.705941  |
| H  | -2.896670 | -1.408551 | -1.465841 |
| Pd | 0.727748  | -0.387486 | 0.151742  |
| O  | 2.687020  | -1.087983 | -0.119592 |
| C  | 3.189488  | -1.529436 | 0.995212  |
| C  | 4.636047  | -2.004299 | 0.874289  |

|   |           |           |           |
|---|-----------|-----------|-----------|
| O | 2.578325  | -1.602773 | 2.068746  |
| H | 5.039077  | -2.239096 | 1.861770  |
| H | 4.677852  | -2.900354 | 0.243852  |
| H | 5.252336  | -1.240559 | 0.389041  |
| H | -0.629901 | -1.938438 | 1.378472  |
| C | 1.417526  | 1.416021  | -0.176017 |
| N | 1.848554  | 2.485492  | -0.347215 |
| C | 2.404104  | 3.807813  | -0.534107 |
| C | 1.559375  | 4.794038  | 0.293039  |
| H | 1.962576  | 5.805029  | 0.174528  |
| H | 0.517903  | 4.791608  | -0.042643 |
| H | 1.582988  | 4.530738  | 1.354765  |
| C | 3.862496  | 3.776871  | -0.040922 |
| H | 3.908765  | 3.510404  | 1.019315  |
| H | 4.449254  | 3.048327  | -0.608526 |
| H | 4.311694  | 4.766736  | -0.172246 |
| C | 2.334158  | 4.141147  | -2.035629 |
| H | 1.298521  | 4.129928  | -2.389132 |
| H | 2.749457  | 5.139830  | -2.205560 |
| H | 2.911092  | 3.419363  | -2.621823 |

### IV<sub>t-BuNC</sub>

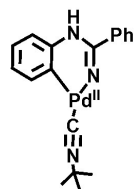

E= -988.3423999au

|   |           |           |          |
|---|-----------|-----------|----------|
| C | 0.271748  | 1.371464  | 0.063589 |
| C | -1.001379 | 1.982441  | 0.074532 |
| C | -2.355434 | -0.104467 | 0.007403 |
| H | 2.388813  | 1.763115  | 0.093783 |
| C | 1.399882  | 2.207272  | 0.102378 |
| C | -1.100934 | 3.390312  | 0.131434 |
| C | 0.031579  | 4.189523  | 0.175817 |
| C | 1.296192  | 3.596947  | 0.159756 |
| H | -2.087842 | 3.850473  | 0.136588 |
| H | -0.073709 | 5.270341  | 0.220248 |
| H | 2.194392  | 4.207981  | 0.193447 |
| N | -2.204594 | 1.278687  | 0.028538 |

|    |           |           |           |    |           |           |           |
|----|-----------|-----------|-----------|----|-----------|-----------|-----------|
| N  | -1.390143 | -0.936347 | 0.003981  | C  | 2.546938  | 0.259893  | -0.219509 |
| C  | -3.777420 | -0.578482 | -0.020138 | H  | -1.880144 | 2.736316  | -0.472502 |
| C  | -4.096501 | -1.804596 | 0.582511  | C  | -0.860652 | 3.007249  | -0.222713 |
| C  | -4.795972 | 0.150813  | -0.652370 | C  | 1.721456  | 3.784334  | 0.403270  |
| C  | -5.405571 | -2.279839 | 0.568560  | C  | 0.722454  | 4.745391  | 0.336934  |
| H  | -3.301025 | -2.369782 | 1.056835  | C  | -0.577672 | 4.353183  | 0.014199  |
| C  | -6.107356 | -0.328536 | -0.668014 | H  | 2.745124  | 4.078587  | 0.630763  |
| H  | -4.562857 | 1.078657  | -1.168620 | H  | 0.959541  | 5.788551  | 0.525476  |
| C  | -6.417304 | -1.542199 | -0.053556 | H  | -1.373445 | 5.090667  | -0.049375 |
| H  | -5.639145 | -3.227813 | 1.046236  | N  | 2.524891  | 1.543212  | 0.249797  |
| H  | -6.883251 | 0.243867  | -1.169669 | N  | 1.523547  | -0.251546 | -0.812128 |
| H  | -7.438327 | -1.914348 | -0.063602 | C  | 3.802950  | -0.518264 | -0.054545 |
| H  | -3.042174 | 1.822260  | 0.181748  | C  | 4.133299  | -1.498132 | -1.003889 |
| Pd | 0.498346  | -0.633510 | -0.001315 | C  | 4.645572  | -0.305996 | 1.047769  |
| C  | 2.501344  | -0.757232 | -0.033839 | C  | 5.302799  | -2.240577 | -0.858621 |
| N  | 3.667656  | -0.872838 | -0.054695 | H  | 3.472080  | -1.657769 | -1.849218 |
| C  | 5.105152  | -1.014278 | -0.081218 | C  | 5.815779  | -1.051632 | 1.185533  |
| C  | 5.719478  | 0.394172  | -0.187408 | H  | 4.370707  | 0.415127  | 1.812788  |
| H  | 6.811222  | 0.314899  | -0.210714 | C  | 6.147653  | -2.016868 | 0.232044  |
| H  | 5.387235  | 0.895493  | -1.101699 | H  | 5.557024  | -2.993148 | -1.599419 |
| H  | 5.434156  | 1.009185  | 0.671763  | H  | 6.461197  | -0.886755 | 2.043570  |
| C  | 5.539171  | -1.706467 | 1.224588  | H  | 7.058979  | -2.597914 | 0.342251  |
| H  | 5.248501  | -1.111130 | 2.095570  | H  | 3.428747  | 1.971336  | 0.407347  |
| H  | 5.081040  | -2.696565 | 1.310966  | Pd | -0.378187 | 0.043199  | -0.457792 |
| H  | 6.627622  | -1.825090 | 1.230873  | C  | -2.337723 | 0.251482  | -0.118708 |
| C  | 5.476424  | -1.869366 | -1.307416 | N  | -3.479016 | 0.106811  | 0.063034  |
| H  | 5.140704  | -1.389918 | -2.232046 | C  | -4.838208 | -0.387829 | 0.219963  |
| H  | 6.563693  | -1.990527 | -1.352321 | C  | -5.794125 | 0.814854  | 0.183873  |
| H  | 5.018023  | -2.861054 | -1.243301 | H  | -6.823139 | 0.458949  | 0.295062  |

**V<sub>t-BuNC</sub>**

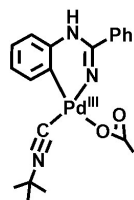

**E= -1216.7904936au**

|   |          |          |           |   |           |           |          |
|---|----------|----------|-----------|---|-----------|-----------|----------|
| C | 0.117544 | 1.998621 | -0.139722 | H | -5.916340 | -1.502306 | 1.723556 |
| C | 1.427559 | 2.429587 | 0.163963  | H | -4.204724 | -1.967587 | 1.569833 |

|   |           |           |           |
|---|-----------|-----------|-----------|
| O | -1.097793 | -1.928571 | -0.773845 |
| C | -1.448620 | -2.738249 | 0.190190  |
| O | -2.527566 | -3.338262 | 0.209476  |
| C | -0.441071 | -2.938377 | 1.325113  |
| H | 0.557051  | -3.135301 | 0.920039  |
| H | -0.371267 | -2.023858 | 1.928334  |
| H | -0.752770 | -3.763440 | 1.969755  |

### VI<sub>t-BuNC</sub>

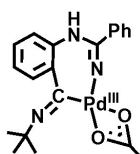

E=-1216.8026447au

|   |           |           |           |
|---|-----------|-----------|-----------|
| C | -0.870713 | 1.208371  | -1.048209 |
| C | 0.343754  | 1.139655  | -1.777704 |
| C | 1.822069  | -0.284077 | -0.271401 |
| H | -2.972913 | 1.648679  | -1.127622 |
| C | -2.045420 | 1.652970  | -1.691810 |
| C | 0.345175  | 1.603434  | -3.107379 |
| C | -0.812739 | 2.074100  | -3.712141 |
| C | -2.023398 | 2.089940  | -3.008241 |
| H | 1.274535  | 1.572160  | -3.671641 |
| H | -0.774853 | 2.413009  | -4.743439 |
| H | -2.935083 | 2.438224  | -3.483216 |
| N | 1.558284  | 0.710414  | -1.241506 |
| N | 0.987390  | -0.992219 | 0.374914  |
| C | 3.289733  | -0.473243 | -0.015412 |
| C | 3.761473  | -1.749517 | 0.327177  |
| C | 4.196790  | 0.595201  | -0.088233 |
| C | 5.116347  | -1.953266 | 0.577538  |
| H | 3.051989  | -2.567909 | 0.390625  |
| C | 5.554012  | 0.386733  | 0.164766  |
| H | 3.840833  | 1.597736  | -0.310723 |
| C | 6.017440  | -0.887548 | 0.494211  |
| H | 5.471527  | -2.947367 | 0.834882  |
| H | 6.245652  | 1.223330  | 0.112623  |
| H | 7.074091  | -1.049719 | 0.689002  |
| H | 2.352059  | 0.887222  | -1.843921 |

|    |           |           |           |
|----|-----------|-----------|-----------|
| Pd | -0.968460 | -1.178013 | 0.232760  |
| C  | -0.964238 | 0.792797  | 0.364085  |
| N  | -1.126775 | 1.288165  | 1.479608  |
| C  | -1.199766 | 2.667408  | 2.003405  |
| C  | -0.378740 | 2.673913  | 3.305105  |
| H  | -0.435635 | 3.658218  | 3.783107  |
| H  | -0.760044 | 1.921267  | 4.001648  |
| H  | 0.673163  | 2.447481  | 3.101359  |
| C  | -0.638677 | 3.703835  | 1.014661  |
| H  | 0.395703  | 3.466165  | 0.742996  |
| H  | -1.232262 | 3.757691  | 0.097714  |
| H  | -0.647627 | 4.695055  | 1.482299  |
| C  | -2.682226 | 2.947059  | 2.310470  |
| H  | -3.087191 | 2.184260  | 2.982334  |
| H  | -2.785508 | 3.926660  | 2.790538  |
| H  | -3.279741 | 2.948606  | 1.392486  |
| O  | -1.582173 | -3.411013 | -0.025538 |
| C  | -2.774576 | -3.014505 | 0.080836  |
| C  | -3.924984 | -3.997323 | 0.059526  |
| O  | -3.042406 | -1.767454 | 0.236038  |
| H  | -4.760789 | -3.590424 | -0.516969 |
| H  | -3.604095 | -4.953845 | -0.358297 |
| H  | -4.278206 | -4.160272 | 1.084673  |

### VII<sub>t-BuNC</sub>

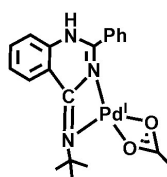

E= -1216.8698312au

|   |           |          |           |
|---|-----------|----------|-----------|
| H | 2.033481  | 1.541550 | 0.410683  |
| C | 1.720103  | 2.570751 | 0.272389  |
| C | 0.361682  | 2.882377 | 0.096169  |
| C | 2.674653  | 3.586129 | 0.263292  |
| C | -0.655873 | 1.807293 | 0.106904  |
| C | -0.013940 | 4.224374 | -0.100835 |
| C | 2.293317  | 4.916858 | 0.079848  |
| H | 3.720315  | 3.326853 | 0.398427  |
| N | -1.933499 | 2.150341 | 0.484378  |

|    |           |           |           |
|----|-----------|-----------|-----------|
| N  | -0.368817 | 0.582975  | -0.230406 |
| C  | 0.945798  | 5.233857  | -0.107433 |
| H  | -1.049981 | 4.486365  | -0.301604 |
| H  | 3.042367  | 5.704009  | 0.073170  |
| C  | -3.010582 | 1.318423  | 0.205536  |
| H  | 0.642806  | 6.263904  | -0.272856 |
| C  | -4.323414 | 1.806930  | 0.267018  |
| C  | -2.741691 | -0.012567 | -0.192504 |
| C  | -5.375720 | 0.998257  | -0.140251 |
| H  | -4.503966 | 2.825058  | 0.603074  |
| C  | -3.823614 | -0.779852 | -0.657491 |
| C  | -5.123415 | -0.288353 | -0.633084 |
| H  | -6.391868 | 1.379819  | -0.102237 |
| H  | -3.637941 | -1.768272 | -1.054084 |
| H  | -5.940264 | -0.904333 | -0.995914 |
| C  | -1.328680 | -0.448091 | -0.120510 |
| H  | -2.109618 | 3.085768  | 0.822350  |
| N  | -0.746768 | -1.597656 | 0.014259  |
| Pd | 1.386639  | -0.948827 | -0.161240 |
| C  | -1.261342 | -2.952849 | 0.307315  |
| C  | -2.434215 | -2.975007 | 1.309984  |
| H  | -2.619858 | -4.009236 | 1.619988  |
| H  | -2.173493 | -2.400134 | 2.205754  |
| H  | -3.370343 | -2.579467 | 0.914673  |
| C  | -1.602923 | -3.669043 | -1.016819 |
| H  | -2.436579 | -3.203487 | -1.551573 |
| H  | -0.732858 | -3.659600 | -1.681037 |
| H  | -1.872136 | -4.712396 | -0.817435 |
| C  | -0.084069 | -3.707723 | 0.964823  |
| H  | 0.194816  | -3.233329 | 1.911518  |
| H  | -0.373091 | -4.745332 | 1.168931  |
| H  | 0.798757  | -3.704574 | 0.320209  |
| O  | 3.154534  | -2.423021 | -0.016892 |
| C  | 3.941372  | -1.437326 | -0.109892 |
| C  | 5.442147  | -1.664256 | -0.100888 |
| O  | 3.507064  | -0.244031 | -0.228944 |
| H  | 5.921586  | -0.974356 | 0.600999  |
| H  | 5.677935  | -2.695936 | 0.168426  |
| H  | 5.847766  | -1.451144 | -1.096774 |

### VIII<sub>t-BuNC</sub>

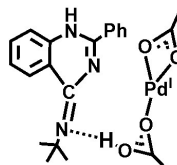

E= -1445.9534219au

|    |           |           |           |
|----|-----------|-----------|-----------|
| H  | 2.652103  | 3.991263  | -0.123375 |
| C  | 3.194084  | 3.048571  | -0.125914 |
| C  | 2.499658  | 1.830548  | -0.214657 |
| C  | 4.587834  | 3.065137  | -0.094827 |
| C  | 1.018681  | 1.791185  | -0.239600 |
| C  | 3.223194  | 0.629078  | -0.278575 |
| C  | 5.301170  | 1.865948  | -0.146957 |
| H  | 5.114873  | 4.013458  | -0.038358 |
| N  | 0.353645  | 2.778773  | 0.444064  |
| N  | 0.387624  | 0.853487  | -0.875519 |
| C  | 4.615757  | 0.651691  | -0.239949 |
| H  | 2.685448  | -0.310946 | -0.338351 |
| H  | 6.387267  | 1.878144  | -0.116949 |
| C  | -0.995796 | 2.995607  | 0.220618  |
| H  | 5.166674  | -0.283886 | -0.274258 |
| C  | -1.602312 | 4.178900  | 0.668981  |
| C  | -1.720337 | 2.025923  | -0.516398 |
| C  | -2.916516 | 4.451400  | 0.322142  |
| H  | -1.024820 | 4.885760  | 1.259591  |
| C  | -3.030656 | 2.368191  | -0.896353 |
| C  | -3.623993 | 3.556857  | -0.490924 |
| H  | -3.383520 | 5.371625  | 0.660940  |
| H  | -3.593312 | 1.695047  | -1.524200 |
| H  | -4.639097 | 3.784852  | -0.800795 |
| C  | -1.007559 | 0.754656  | -0.820760 |
| H  | 0.870040  | 3.410708  | 1.039828  |
| N  | -1.433550 | -0.461571 | -1.034484 |
| Pd | 0.170628  | -1.650882 | 0.643534  |
| C  | -2.797325 | -1.051935 | -0.988157 |
| C  | -3.628619 | -0.612739 | 0.235786  |
| H  | -4.522071 | -1.244131 | 0.304378  |
| H  | -3.039053 | -0.748355 | 1.148630  |

|   |           |           |           |    |           |           |           |
|---|-----------|-----------|-----------|----|-----------|-----------|-----------|
| H | -3.965034 | 0.423779  | 0.196441  | N  | -0.289911 | 2.721557  | 0.230181  |
| C | -3.518391 | -0.827529 | -2.337869 | N  | 0.169532  | 0.777776  | -0.970969 |
| H | -3.714379 | 0.222381  | -2.567201 | C  | 4.337562  | 1.512676  | -0.431239 |
| H | -2.914855 | -1.232760 | -3.157398 | H  | 2.667787  | 0.159108  | -0.572668 |
| H | -4.480646 | -1.351971 | -2.333820 | H  | 5.809126  | 3.080283  | -0.251483 |
| C | -2.583780 | -2.579510 | -0.859726 | C  | -1.648670 | 2.637539  | -0.008490 |
| H | -2.069754 | -2.820185 | 0.078094  | H  | 5.071677  | 0.716661  | -0.512422 |
| H | -3.550935 | -3.094662 | -0.867606 | C  | -2.510220 | 3.670113  | 0.393887  |
| H | -1.984688 | -2.965095 | -1.690756 | C  | -2.131960 | 1.521960  | -0.734016 |
| O | -0.877003 | -0.988722 | 2.446915  | C  | -3.838217 | 3.640862  | 0.000659  |
| C | -0.135869 | -1.685886 | 3.226597  | H  | -2.120168 | 4.498627  | 0.979049  |
| C | -0.443583 | -1.655232 | 4.712752  | C  | -3.469775 | 1.560140  | -1.171925 |
| O | 0.813162  | -2.387456 | 2.786571  | C  | -4.312727 | 2.600819  | -0.814611 |
| H | 0.317950  | -2.197026 | 5.277307  | H  | -4.503937 | 4.445133  | 0.299389  |
| H | -0.501464 | -0.618973 | 5.062025  | H  | -3.838311 | 0.771235  | -1.811656 |
| H | -1.422817 | -2.113706 | 4.892373  | H  | -5.340052 | 2.608725  | -1.164512 |
| C | 1.237735  | -2.438244 | -2.181639 | C  | -1.161345 | 0.456993  | -1.002938 |
| O | 1.458557  | -2.510326 | -0.967996 | H  | 0.066411  | 3.459401  | 0.822978  |
| C | 2.140129  | -3.104046 | -3.190609 | N  | -1.399105 | -0.808728 | -1.311995 |
| H | 1.547130  | -3.722229 | -3.871828 | Pd | 0.862973  | -1.378654 | 0.835371  |
| H | 2.638524  | -2.338069 | -3.795180 | C  | -2.558933 | -1.738447 | -1.099332 |
| H | 2.885916  | -3.713940 | -2.679915 | C  | -3.405219 | -1.354581 | 0.127754  |
| O | 0.228164  | -1.791447 | -2.722127 | H  | -4.046006 | -2.206620 | 0.378766  |
| H | -0.326491 | -1.303145 | -2.011280 | H  | -2.752877 | -1.147216 | 0.983022  |

### IX<sub>t-BuNC</sub>

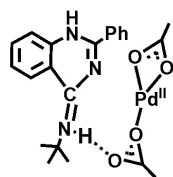

E= -1445.9581505au

|   |          |          |           |   |           |           |           |
|---|----------|----------|-----------|---|-----------|-----------|-----------|
| H | 1.717994 | 4.356628 | -0.169394 | H | -2.715980 | -3.862694 | -0.714993 |
| C | 2.442352 | 3.546405 | -0.205886 | H | -1.240746 | -3.418678 | -1.612412 |
| C | 2.021162 | 2.211278 | -0.345443 | O | -0.604657 | -0.569579 | 2.154146  |
| C | 3.799614 | 3.857006 | -0.174617 | C | -0.293315 | -1.210097 | 3.233616  |
| C | 0.585554 | 1.867478 | -0.377810 | C | -1.154718 | -0.938919 | 4.457925  |
| C | 2.981922 | 1.193080 | -0.470132 | O | 0.650603  | -2.022881 | 3.280909  |
| C | 4.750205 | 2.838650 | -0.280913 | H | -0.729425 | -1.419785 | 5.341092  |
| H | 4.113874 | 4.892240 | -0.078058 | H | -1.244982 | 0.139401  | 4.627053  |



|   |           |           |           |
|---|-----------|-----------|-----------|
| H | -2.166183 | -1.327152 | 4.289059  |
| C | 1.920582  | -2.421690 | -1.702251 |
| O | 2.304834  | -2.132611 | -0.515425 |
| C | 2.981510  | -3.033107 | -2.613145 |
| H | 2.586567  | -3.943475 | -3.075643 |
| H | 3.209387  | -2.332368 | -3.425058 |
| H | 3.896985  | -3.262314 | -2.064089 |
| O | 0.775338  | -2.237647 | -2.181845 |
| H | -0.511437 | -1.317872 | -1.578829 |

**X<sub>t</sub>-BuNC**

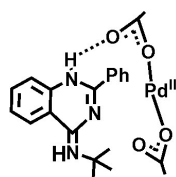

E= -1445.9864412au

|   |           |           |           |
|---|-----------|-----------|-----------|
| C | 1.520804  | -1.115723 | 1.610204  |
| C | 0.146907  | -0.834118 | 1.754912  |
| C | 0.474926  | 1.282699  | 0.742970  |
| H | 3.083679  | -2.551939 | 2.081393  |
| C | 2.023699  | -2.321314 | 2.140355  |
| C | -0.714967 | -1.746259 | 2.395350  |
| C | -0.194371 | -2.927775 | 2.890798  |
| C | 1.178783  | -3.216927 | 2.771634  |
| H | -1.764923 | -1.492195 | 2.491971  |
| H | -0.852324 | -3.635747 | 3.386113  |
| H | 1.576100  | -4.141427 | 3.179161  |
| N | -0.344316 | 0.365068  | 1.279741  |
| N | 1.783615  | 1.083257  | 0.599486  |
| C | -0.080839 | 2.577754  | 0.293332  |
| C | -1.398363 | 2.691757  | -0.178877 |
| C | 0.744718  | 3.714281  | 0.315472  |
| C | -1.877820 | 3.927185  | -0.611929 |
| H | -2.039742 | 1.820480  | -0.244944 |
| C | 0.253751  | 4.947747  | -0.102366 |
| H | 1.764982  | 3.618065  | 0.669778  |
| C | -1.059289 | 5.057154  | -0.568446 |
| H | -2.893288 | 4.001607  | -0.989923 |
| H | 0.896199  | 5.823250  | -0.068797 |

|    |           |           |           |
|----|-----------|-----------|-----------|
| H  | -1.439801 | 6.018412  | -0.903151 |
| Pd | -2.181962 | -1.154724 | -1.216161 |
| C  | 2.302677  | -0.111092 | 0.906636  |
| N  | 3.578027  | -0.366683 | 0.577114  |
| C  | 4.495748  | 0.445820  | -0.273957 |
| C  | 5.729764  | -0.445229 | -0.498267 |
| H  | 6.479517  | 0.097111  | -1.081416 |
| H  | 6.191551  | -0.735962 | 0.453667  |
| H  | 5.467391  | -1.353233 | -1.055455 |
| C  | 3.838311  | 0.774771  | -1.627745 |
| H  | 3.412756  | -0.125403 | -2.080793 |
| H  | 3.028519  | 1.495293  | -1.507646 |
| H  | 4.591560  | 1.195854  | -2.303532 |
| C  | 4.908036  | 1.724436  | 0.475507  |
| H  | 5.406210  | 1.480421  | 1.420617  |
| H  | 5.604540  | 2.304878  | -0.139852 |
| H  | 4.035679  | 2.345072  | 0.689205  |
| O  | -2.974542 | 0.432000  | 1.722517  |
| C  | -3.911001 | 0.222733  | 0.907163  |
| C  | -5.339277 | 0.474653  | 1.374166  |
| O  | -3.789910 | -0.201250 | -0.289603 |
| H  | -5.733847 | -0.446130 | 1.821588  |
| H  | -5.359452 | 1.256777  | 2.136970  |
| H  | -5.982711 | 0.740202  | 0.532032  |
| O  | 0.726987  | -1.071818 | -1.423515 |
| C  | 1.320300  | -2.740749 | -3.055884 |
| H  | 0.942053  | -3.737833 | -3.294801 |
| H  | 1.471263  | -2.201249 | -3.999051 |
| H  | 2.287787  | -2.814822 | -2.550849 |
| C  | 0.328494  | -1.966702 | -2.192782 |
| O  | -0.906520 | -2.294784 | -2.357729 |
| H  | -1.394006 | 0.501977  | 1.366781  |
| H  | 3.875216  | -1.321440 | 0.717125  |

**TSI<sub>t</sub>-BuNC**

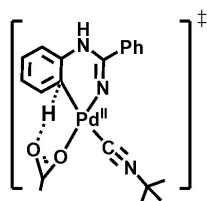

E= -1217.4036982au

|    |           |           |           |
|----|-----------|-----------|-----------|
| C  | -1.101399 | -2.060184 | -0.316250 |
| C  | -2.399428 | -1.492344 | -0.319482 |
| C  | -1.762663 | 0.882814  | 0.018556  |
| H  | 0.055818  | -3.733995 | -1.022385 |
| C  | -0.937988 | -3.295629 | -0.999185 |
| C  | -3.489483 | -2.209000 | -0.855471 |
| C  | -3.288455 | -3.434154 | -1.473477 |
| C  | -1.999355 | -3.978363 | -1.573497 |
| H  | -4.486406 | -1.773228 | -0.824644 |
| H  | -4.138759 | -3.963029 | -1.897019 |
| H  | -1.840778 | -4.927434 | -2.077320 |
| N  | -2.641433 | -0.217384 | 0.175442  |
| N  | -0.530210 | 0.879515  | -0.303749 |
| C  | -2.448347 | 2.202403  | 0.249002  |
| C  | -2.037295 | 3.326084  | -0.483974 |
| C  | -3.470533 | 2.353147  | 1.199254  |
| C  | -2.646909 | 4.562380  | -0.286196 |
| H  | -1.235789 | 3.203983  | -1.204742 |
| C  | -4.074836 | 3.596250  | 1.402636  |
| H  | -3.774582 | 1.506879  | 1.810197  |
| C  | -3.670111 | 4.703184  | 0.656990  |
| H  | -2.325874 | 5.420721  | -0.871118 |
| H  | -4.857230 | 3.697376  | 2.150418  |
| H  | -4.143635 | 5.669217  | 0.811016  |
| H  | -3.618574 | 0.047550  | 0.171559  |
| Pd | 0.584821  | -0.765236 | -0.184887 |
| O  | 1.862762  | -2.449122 | 0.353316  |
| C  | 1.404531  | -3.054346 | 1.370531  |
| C  | 2.305611  | -4.043957 | 2.084292  |
| O  | 0.225915  | -2.905875 | 1.830663  |
| H  | 2.350990  | -3.793570 | 3.148878  |
| H  | 1.874462  | -5.047806 | 2.005476  |

|   |           |           |           |
|---|-----------|-----------|-----------|
| H | 3.308608  | -4.038596 | 1.654777  |
| H | -0.484603 | -2.266224 | 0.852777  |
| C | 2.172004  | 0.481090  | -0.241643 |
| N | 3.048133  | 1.249385  | -0.299679 |
| C | 4.097668  | 2.239983  | -0.378702 |
| C | 3.736900  | 3.383908  | 0.587079  |
| H | 4.512435  | 4.155555  | 0.542321  |
| H | 2.777326  | 3.833219  | 0.314710  |
| H | 3.668467  | 3.017204  | 1.615822  |
| C | 5.419595  | 1.565182  | 0.030361  |
| H | 5.359696  | 1.180113  | 1.052955  |
| H | 5.656959  | 0.734217  | -0.640998 |
| H | 6.232451  | 2.296977  | -0.019333 |
| C | 4.160553  | 2.743024  | -1.832927 |
| H | 3.208256  | 3.192995  | -2.129314 |
| H | 4.948046  | 3.498330  | -1.923259 |
| H | 4.385762  | 1.920921  | -2.519277 |

**TSII<sub>t</sub>-BuNC**

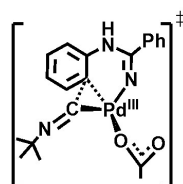

E= -1216.7637993au

|   |           |           |           |
|---|-----------|-----------|-----------|
| C | -1.272364 | -0.382783 | 1.094376  |
| C | -0.139540 | -1.021170 | 1.659379  |
| C | 1.726487  | -0.067929 | 0.227818  |
| H | -3.376681 | 0.010395  | 1.309519  |
| C | -2.514782 | -0.473884 | 1.758801  |
| C | -0.305080 | -1.743029 | 2.859535  |
| C | -1.539016 | -1.818639 | 3.492563  |
| C | -2.657010 | -1.173756 | 2.949941  |
| H | 0.559409  | -2.231957 | 3.304807  |
| H | -1.626880 | -2.380157 | 4.418610  |
| H | -3.621057 | -1.223528 | 3.446648  |
| N | 1.134589  | -1.016224 | 1.095022  |
| N | 1.160584  | 0.874400  | -0.406905 |
| C | 3.207938  | -0.268040 | 0.062267  |
| C | 4.036699  | 0.855725  | -0.071007 |

|    |           |           |           |
|----|-----------|-----------|-----------|
| C  | 3.777050  | -1.549480 | 0.003390  |
| C  | 5.410062  | 0.698555  | -0.244259 |
| H  | 3.587726  | 1.842720  | -0.035238 |
| C  | 5.153611  | -1.702619 | -0.172942 |
| H  | 3.143700  | -2.431062 | 0.064234  |
| C  | 5.973485  | -0.579848 | -0.293297 |
| H  | 6.043582  | 1.576297  | -0.338541 |
| H  | 5.581989  | -2.700081 | -0.224471 |
| H  | 7.045012  | -0.699419 | -0.428382 |
| H  | 1.818259  | -1.522385 | 1.643305  |
| Pd | -1.048350 | 1.295233  | -0.145675 |
| C  | -1.443457 | -0.454809 | -0.735452 |
| N  | -1.616087 | -1.348434 | -1.507177 |
| C  | -1.815693 | -2.763448 | -1.787916 |
| C  | -2.323098 | -3.477242 | -0.522075 |
| H  | -2.475341 | -4.540433 | -0.737988 |
| H  | -1.603076 | -3.389607 | 0.297072  |
| H  | -3.275978 | -3.053905 | -0.189300 |
| C  | -2.843485 | -2.871618 | -2.927684 |
| H  | -3.805364 | -2.444676 | -2.625805 |
| H  | -2.493255 | -2.338009 | -3.816377 |
| H  | -2.997981 | -3.924011 | -3.188391 |
| C  | -0.453805 | -3.329963 | -2.231765 |
| H  | 0.286267  | -3.227957 | -1.431608 |
| H  | -0.559961 | -4.391871 | -2.478184 |
| H  | -0.083431 | -2.800567 | -3.114695 |
| O  | -1.250514 | 3.077496  | -1.424955 |
| C  | -1.005752 | 3.836812  | -0.429379 |
| C  | -0.887270 | 5.328462  | -0.648912 |
| O  | -0.832359 | 3.346320  | 0.728671  |
| H  | 0.133086  | 5.559196  | -0.978094 |
| H  | -1.575156 | 5.655075  | -1.433226 |
| H  | -1.081254 | 5.868743  | 0.280586  |

**TSIII<sub>t</sub>-BuNC**

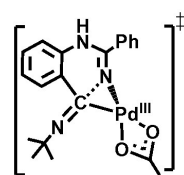

E= -1216.796688au

|    |           |           |           |
|----|-----------|-----------|-----------|
| Pd | -1.151483 | 0.682887  | 0.399140  |
| H  | 2.529842  | 2.319315  | 0.354063  |
| C  | 3.370963  | 1.634291  | 0.366309  |
| C  | 3.112371  | 0.254798  | 0.366253  |
| C  | 4.681706  | 2.104074  | 0.388866  |
| C  | 1.690779  | -0.213695 | 0.343433  |
| C  | 4.192152  | -0.642447 | 0.373177  |
| C  | 5.752364  | 1.204944  | 0.404565  |
| H  | 4.869796  | 3.174178  | 0.398786  |
| N  | 1.483754  | -1.443794 | 0.965514  |
| N  | 0.791267  | 0.497585  | -0.240741 |
| C  | 5.504731  | -0.168501 | 0.392084  |
| H  | 4.012785  | -1.713422 | 0.325193  |
| H  | 6.774358  | 1.573767  | 0.422204  |
| C  | 0.351432  | -2.237010 | 0.860194  |
| H  | 6.332116  | -0.872936 | 0.386883  |
| C  | 0.238932  | -3.372230 | 1.683529  |
| C  | -0.659325 | -1.980717 | -0.097040 |
| C  | -0.840452 | -4.235600 | 1.561083  |
| H  | 1.015234  | -3.568778 | 2.419409  |
| C  | -1.741899 | -2.876483 | -0.209478 |
| C  | -1.839636 | -3.991907 | 0.608859  |
| H  | -0.905452 | -5.103329 | 2.211341  |
| H  | -2.503399 | -2.662652 | -0.952119 |
| H  | -2.685860 | -4.665098 | 0.513690  |
| C  | -0.633865 | -0.799049 | -0.973406 |
| O  | -1.460818 | 2.218462  | 2.190678  |
| C  | -3.736083 | 2.728457  | 2.835347  |
| H  | -4.343228 | 1.983871  | 3.361619  |
| H  | -3.264961 | 3.396951  | 3.558457  |
| H  | -4.409534 | 3.297856  | 2.186114  |
| C  | -2.689205 | 2.028930  | 1.997653  |
| O  | -3.090162 | 1.226355  | 1.074732  |

|   |           |           |           |
|---|-----------|-----------|-----------|
| H | 2.201751  | -1.761732 | 1.601988  |
| N | -0.908030 | -0.718494 | -2.180978 |
| C | -0.915398 | 0.327165  | -3.205102 |
| C | 0.544217  | 0.641598  | -3.590120 |
| H | 0.561136  | 1.386586  | -4.393911 |
| H | 1.089021  | 1.031006  | -2.726324 |
| H | 1.051089  | -0.261163 | -3.948159 |
| C | -1.674504 | -0.251121 | -4.414488 |
| H | -1.193617 | -1.168343 | -4.769640 |
| H | -2.709612 | -0.488791 | -4.146153 |
| H | -1.688052 | 0.474324  | -5.235009 |
| C | -1.628519 | 1.601982  | -2.706720 |
| H | -1.068159 | 2.063294  | -1.886387 |
| H | -1.701797 | 2.328738  | -3.524386 |
| H | -2.640909 | 1.373070  | -2.357961 |

**TSIV<sub>t-BuNC</sub>**

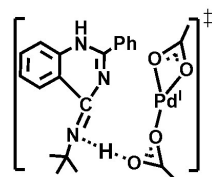

E= -1445.9511165au

|   |           |           |           |
|---|-----------|-----------|-----------|
| H | 2.602932  | 3.953890  | -0.080412 |
| C | 3.156271  | 3.020025  | -0.143392 |
| C | 2.478431  | 1.799400  | -0.303218 |
| C | 4.549462  | 3.055432  | -0.120043 |
| C | 0.998646  | 1.744666  | -0.324137 |
| C | 3.218496  | 0.615022  | -0.450778 |
| C | 5.279307  | 1.872522  | -0.253179 |
| H | 5.062901  | 4.006070  | -0.007126 |
| N | 0.324351  | 2.707730  | 0.380195  |
| N | 0.374444  | 0.813634  | -0.984000 |
| C | 4.610756  | 0.656965  | -0.420440 |
| H | 2.697217  | -0.328762 | -0.568370 |
| H | 6.365276  | 1.898858  | -0.229810 |
| C | -1.028207 | 2.914840  | 0.170785  |
| H | 5.174467  | -0.266022 | -0.520703 |
| C | -1.652345 | 4.076577  | 0.650216  |
| C | -1.739296 | 1.960649  | -0.595748 |

|    |           |           |           |
|----|-----------|-----------|-----------|
| C  | -2.966523 | 4.341826  | 0.297721  |
| H  | -1.089323 | 4.773456  | 1.265754  |
| C  | -3.047343 | 2.297929  | -0.988031 |
| C  | -3.656382 | 3.467181  | -0.553503 |
| H  | -3.447993 | 5.245834  | 0.659011  |
| H  | -3.586682 | 1.638024  | -1.651375 |
| H  | -4.668248 | 3.698859  | -0.870836 |
| C  | -1.012145 | 0.719670  | -0.946854 |
| H  | 0.832820  | 3.317190  | 1.005846  |
| N  | -1.456253 | -0.477096 | -1.238751 |
| Pd | 0.373018  | -1.565992 | 0.764267  |
| C  | -2.794139 | -1.115744 | -1.090174 |
| C  | -3.564597 | -0.654261 | 0.163300  |
| H  | -4.408447 | -1.334482 | 0.323668  |
| H  | -2.912678 | -0.701632 | 1.042556  |
| H  | -3.972279 | 0.354449  | 0.090260  |
| C  | -3.604041 | -0.958834 | -2.395717 |
| H  | -3.871822 | 0.077305  | -2.619610 |
| H  | -3.028768 | -1.343326 | -3.244589 |
| H  | -4.534015 | -1.534151 | -2.324808 |
| C  | -2.508666 | -2.627528 | -0.910981 |
| H  | -1.909400 | -2.801444 | -0.009389 |
| H  | -3.455402 | -3.168695 | -0.809324 |
| H  | -1.967388 | -3.035504 | -1.768516 |
| O  | -0.665019 | -0.680285 | 2.410123  |
| C  | -0.270442 | -1.521368 | 3.302784  |
| C  | -0.779217 | -1.321454 | 4.719293  |
| O  | 0.501609  | -2.467808 | 3.023719  |
| H  | -0.404413 | -2.107245 | 5.378048  |
| H  | -0.456715 | -0.343665 | 5.094398  |
| H  | -1.874665 | -1.325495 | 4.724124  |
| C  | 1.159745  | -2.486135 | -2.048522 |
| O  | 1.490305  | -2.486562 | -0.839461 |
| C  | 2.039413  | -3.216575 | -3.044008 |
| H  | 1.437947  | -3.935724 | -3.609429 |
| H  | 2.448154  | -2.499492 | -3.764572 |
| H  | 2.853512  | -3.731842 | -2.532163 |
| O  | 0.123957  | -1.912811 | -2.554432 |
| H  | -0.553498 | -1.245786 | -1.842860 |

### TSV<sub>t-Bu</sub>NC

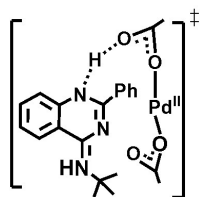

E= -1445.98079au

|    |           |           |           |
|----|-----------|-----------|-----------|
| C  | -1.517856 | -1.268082 | -1.411879 |
| C  | -0.172559 | -0.872167 | -1.614204 |
| C  | -0.603417 | 1.187543  | -0.627338 |
| H  | -2.956935 | -2.875939 | -1.716921 |
| C  | -1.929547 | -2.546817 | -1.847853 |
| C  | 0.726493  | -1.756131 | -2.256087 |
| C  | 0.297174  | -3.001662 | -2.668515 |
| C  | -1.037813 | -3.404170 | -2.463986 |
| H  | 1.747876  | -1.433793 | -2.421946 |
| H  | 0.994501  | -3.676348 | -3.156802 |
| H  | -1.366677 | -4.384910 | -2.794009 |
| N  | 0.268954  | 0.363242  | -1.202953 |
| N  | -1.908819 | 0.920920  | -0.444292 |
| C  | -0.131381 | 2.512204  | -0.150473 |
| C  | 1.122950  | 2.657264  | 0.460764  |
| C  | -0.965055 | 3.633920  | -0.278445 |
| C  | 1.538117  | 3.906588  | 0.920901  |
| H  | 1.753108  | 1.788289  | 0.614523  |
| C  | -0.539648 | 4.883424  | 0.166988  |
| H  | -1.940861 | 3.517407  | -0.738117 |
| C  | 0.713716  | 5.023036  | 0.768712  |
| H  | 2.504214  | 4.003963  | 1.408600  |
| H  | -1.187840 | 5.747685  | 0.049369  |
| H  | 1.041648  | 5.995918  | 1.125298  |
| Pd | 2.423811  | -1.180790 | 1.037995  |
| C  | -2.373668 | -0.282154 | -0.774800 |
| N  | -3.669446 | -0.574656 | -0.523671 |
| C  | -4.681069 | 0.239372  | 0.202312  |
| C  | -5.952553 | -0.626099 | 0.238279  |
| H  | -6.753816 | -0.092917 | 0.758164  |
| H  | -6.304402 | -0.857377 | -0.774714 |

|   |           |           |           |
|---|-----------|-----------|-----------|
| H | -5.777648 | -1.567947 | 0.773575  |
| C | -4.208704 | 0.533417  | 1.638421  |
| H | -4.037114 | -0.399662 | 2.187083  |
| H | -3.280088 | 1.106884  | 1.634119  |
| H | -4.976052 | 1.107247  | 2.170763  |
| C | -4.970749 | 1.542805  | -0.563596 |
| H | -5.300908 | 1.325666  | -1.585685 |
| H | -5.766705 | 2.099823  | -0.056428 |
| H | -4.079366 | 2.170142  | -0.608977 |
| O | 2.604307  | 0.943651  | -1.899376 |
| C | 3.659624  | 0.681115  | -1.204707 |
| C | 4.948605  | 1.231345  | -1.777950 |
| O | 3.699267  | 0.044521  | -0.129583 |
| H | 5.053270  | 0.918489  | -2.821638 |
| H | 4.907278  | 2.326242  | -1.771699 |
| H | 5.805468  | 0.892193  | -1.194379 |
| O | 0.027525  | -0.844148 | 1.642189  |
| C | -0.863738 | -2.509596 | 3.149119  |
| H | -0.895961 | -3.593505 | 3.002563  |
| H | -0.642930 | -2.328225 | 4.207375  |
| H | -1.832354 | -2.064979 | 2.909229  |
| C | 0.231120  | -1.895838 | 2.295987  |
| O | 1.370827  | -2.486377 | 2.292057  |
| H | 1.560612  | 0.669675  | -1.480085 |
| H | -3.954125 | -1.521324 | -0.722799 |

### XI<sub>t-Bu</sub>NC

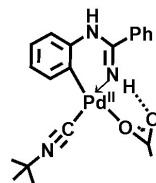

E= -1217.4786918au

|   |           |          |           |
|---|-----------|----------|-----------|
| C | -0.293115 | 1.863707 | 0.132337  |
| C | 0.968169  | 2.464781 | -0.081218 |
| C | 2.401685  | 0.423817 | -0.008375 |
| H | -2.361690 | 2.348968 | 0.496882  |
| C | -1.373458 | 2.752772 | 0.308216  |
| C | 1.108092  | 3.864300 | -0.154067 |

|    |           |           |           |
|----|-----------|-----------|-----------|
| C  | 0.013783  | 4.701955  | 0.003184  |
| C  | -1.239734 | 4.139185  | 0.246951  |
| H  | 2.096145  | 4.290930  | -0.323689 |
| H  | 0.141587  | 5.779382  | -0.054823 |
| H  | -2.111287 | 4.774246  | 0.384373  |
| N  | 2.174151  | 1.744714  | -0.233158 |
| N  | 1.434398  | -0.383886 | 0.271648  |
| C  | 3.816521  | -0.038769 | -0.110065 |
| C  | 4.085440  | -1.345452 | -0.548967 |
| C  | 4.886573  | 0.801200  | 0.237082  |
| C  | 5.402028  | -1.790465 | -0.652032 |
| H  | 3.265101  | -2.011327 | -0.798718 |
| C  | 6.202030  | 0.350168  | 0.132250  |
| H  | 4.696049  | 1.796809  | 0.629641  |
| C  | 6.462825  | -0.945131 | -0.318007 |
| H  | 5.598144  | -2.802286 | -0.995039 |
| H  | 7.020421  | 1.006961  | 0.413758  |
| H  | 7.487568  | -1.297086 | -0.399746 |
| H  | 2.967835  | 2.286120  | -0.542431 |
| Pd | -0.551783 | -0.140840 | 0.177036  |
| C  | -2.512282 | -0.079269 | 0.017902  |
| N  | -3.669470 | -0.176340 | -0.103360 |
| O  | 1.247085  | -3.084504 | 0.384616  |
| C  | 0.010396  | -3.214909 | 0.275560  |
| C  | -0.582676 | -4.624550 | 0.227574  |
| O  | -0.869633 | -2.278417 | 0.205847  |
| H  | -1.209343 | -4.739169 | -0.663573 |
| H  | 0.211390  | -5.374275 | 0.221967  |
| H  | -1.226869 | -4.783180 | 1.100078  |
| H  | 1.639956  | -1.387458 | 0.426780  |
| C  | -5.090319 | -0.384124 | -0.271084 |
| C  | -5.609163 | -1.117975 | 0.979570  |
| H  | -6.684515 | -1.296662 | 0.876552  |
| H  | -5.103894 | -2.080656 | 1.101200  |
| H  | -5.440240 | -0.519637 | 1.880200  |
| C  | -5.759603 | 0.993844  | -0.421783 |
| H  | -5.593420 | 1.607458  | 0.469245  |
| H  | -5.363774 | 1.526690  | -1.291872 |
| H  | -6.838139 | 0.862049  | -0.555461 |

|   |           |           |           |
|---|-----------|-----------|-----------|
| C | -5.291100 | -1.239484 | -1.536116 |
| H | -4.781033 | -2.202250 | -1.436960 |
| H | -6.360256 | -1.422155 | -1.686079 |
| H | -4.897476 | -0.726490 | -2.419005 |

## XII<sub>t-BuNC</sub>

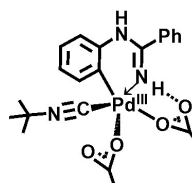

E=-1445.9079036au

|    |           |           |           |
|----|-----------|-----------|-----------|
| Pd | -0.974221 | -0.490491 | 0.362852  |
| H  | 2.910505  | 1.923083  | -0.016177 |
| C  | 3.707323  | 1.211154  | 0.174931  |
| C  | 3.426759  | -0.163692 | 0.174884  |
| C  | 5.003406  | 1.661712  | 0.417177  |
| C  | 2.033232  | -0.632659 | -0.079448 |
| C  | 4.461275  | -1.075035 | 0.438675  |
| C  | 6.031459  | 0.749644  | 0.667767  |
| H  | 5.209852  | 2.728088  | 0.410649  |
| N  | 1.905815  | -1.813229 | -0.746504 |
| N  | 1.005401  | 0.041835  | 0.305491  |
| C  | 5.756402  | -0.618782 | 0.683207  |
| H  | 4.249521  | -2.139453 | 0.495576  |
| H  | 7.040430  | 1.104408  | 0.858588  |
| C  | 0.722862  | -2.426023 | -1.222199 |
| H  | 6.546307  | -1.333000 | 0.897780  |
| C  | 0.910428  | -3.518557 | -2.089771 |
| C  | -0.577629 | -2.012131 | -0.894806 |
| C  | -0.175462 | -4.188076 | -2.638962 |
| H  | 1.923658  | -3.835041 | -2.334352 |
| C  | -1.660495 | -2.689529 | -1.464868 |
| C  | -1.470360 | -3.769273 | -2.329520 |
| H  | -0.008252 | -5.028190 | -3.307248 |
| H  | -2.665929 | -2.374233 | -1.209370 |
| H  | -2.330832 | -4.279770 | -2.753669 |
| H  | 1.106370  | 0.931662  | 0.823757  |
| C  | -1.468938 | 1.010481  | -1.180668 |

|   |           |           |           |
|---|-----------|-----------|-----------|
| C | -0.698551 | 2.086307  | 2.073161  |
| O | -1.439940 | 1.082762  | 1.776897  |
| C | -1.260755 | 2.976317  | 3.181788  |
| H | -2.340448 | 3.108814  | 3.065355  |
| H | -1.094348 | 2.485878  | 4.148414  |
| H | -0.753508 | 3.944109  | 3.189572  |
| O | 0.410696  | 2.379105  | 1.566968  |
| O | -1.269729 | -2.023225 | 2.142643  |
| C | -3.519954 | -2.664647 | 2.735868  |
| H | -4.300201 | -3.114423 | 2.115252  |
| H | -3.039991 | -3.425559 | 3.354899  |
| H | -3.996420 | -1.924552 | 3.389106  |
| C | -2.498031 | -1.965704 | 1.868907  |
| O | -2.913835 | -1.291523 | 0.858861  |
| H | 2.762571  | -2.198541 | -1.116496 |
| N | -1.485226 | 2.093514  | -1.615899 |
| C | -1.438774 | 3.497777  | -1.970726 |
| C | -2.561084 | 4.207248  | -1.190526 |
| H | -2.548557 | 5.275588  | -1.430216 |
| H | -3.540826 | 3.800264  | -1.459386 |
| H | -2.417139 | 4.087322  | -0.113094 |
| C | -0.053350 | 4.026406  | -1.551142 |
| H | 0.129236  | 3.828400  | -0.490406 |
| H | 0.735222  | 3.542398  | -2.137159 |
| H | -0.007074 | 5.105268  | -1.734330 |
| C | -1.655193 | 3.620669  | -3.488507 |
| H | -2.631745 | 3.220755  | -3.779292 |
| H | -1.612222 | 4.676102  | -3.776138 |
| H | -0.878864 | 3.079754  | -4.038686 |

### XIII<sub>t-BuNC</sub>

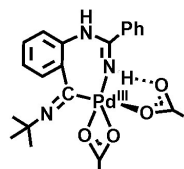

E= -1445.9132437au

|    |           |          |           |
|----|-----------|----------|-----------|
| Pd | 1.051364  | 0.721143 | -0.519154 |
| H  | -3.057769 | 1.665416 | 0.795143  |
| C  | -3.789005 | 1.061881 | 0.265760  |

|   |           |           |           |
|---|-----------|-----------|-----------|
| C | -3.364173 | -0.003894 | -0.544221 |
| C | -5.147433 | 1.353882  | 0.376349  |
| C | -1.904267 | -0.307515 | -0.647984 |
| C | -4.319242 | -0.751943 | -1.251636 |
| C | -6.093605 | 0.598079  | -0.319630 |
| H | -5.465470 | 2.177633  | 1.008719  |
| N | -1.593138 | -1.649965 | -0.741849 |
| N | -1.014958 | 0.622184  | -0.635271 |
| C | -5.676261 | -0.451454 | -1.139976 |
| H | -4.008863 | -1.544620 | -1.928550 |
| H | -7.150904 | 0.831827  | -0.231139 |
| C | -0.348350 | -2.264175 | -1.015608 |
| H | -6.403860 | -1.029688 | -1.702402 |
| C | -0.323425 | -3.312142 | -1.944679 |
| C | 0.844179  | -1.913771 | -0.339725 |
| C | 0.860456  | -3.986945 | -2.231195 |
| H | -1.243502 | -3.585118 | -2.455720 |
| C | 2.042433  | -2.574039 | -0.676115 |
| C | 2.052061  | -3.607727 | -1.605969 |
| H | 0.854913  | -4.793475 | -2.958408 |
| H | 2.960078  | -2.255519 | -0.192183 |
| H | 2.982717  | -4.113731 | -1.843743 |
| H | -1.329615 | 1.597047  | -0.464886 |
| C | 0.877370  | -0.845257 | 0.687326  |
| C | -0.034072 | 3.277355  | 0.905882  |
| O | 0.981615  | 2.492400  | 0.830511  |
| C | 0.230246  | 4.537456  | 1.732894  |
| H | 0.906425  | 4.326987  | 2.565333  |
| H | 0.709504  | 5.285032  | 1.089843  |
| H | -0.714716 | 4.946973  | 2.098123  |
| O | -1.153525 | 3.128490  | 0.372324  |
| O | 2.178929  | 2.103427  | -2.122763 |
| C | 4.583289  | 2.243224  | -1.911714 |
| H | 5.335806  | 1.450356  | -1.874339 |
| H | 4.558766  | 2.699828  | -2.903511 |
| H | 4.867265  | 3.007421  | -1.178602 |
| C | 3.218170  | 1.701178  | -1.549116 |
| O | 3.160431  | 0.825448  | -0.600032 |
| H | -2.393056 | -2.261740 | -0.813765 |

|   |           |           |          |
|---|-----------|-----------|----------|
| N | 0.901447  | -0.736539 | 1.914068 |
| C | 0.866957  | -1.738867 | 2.999901 |
| C | 2.306551  | -1.838461 | 3.538078 |
| H | 2.333787  | -2.490872 | 4.418280 |
| H | 2.979818  | -2.253689 | 2.780198 |
| H | 2.679423  | -0.849822 | 3.821681 |
| C | -0.059594 | -1.153497 | 4.080896 |
| H | 0.289072  | -0.162392 | 4.385214 |
| H | -1.082513 | -1.052987 | 3.701620 |
| H | -0.080349 | -1.808073 | 4.959574 |
| C | 0.353930  | -3.121054 | 2.560609 |
| H | 1.019756  | -3.595114 | 1.833955 |
| H | 0.285574  | -3.779948 | 3.433798 |
| H | -0.645369 | -3.046091 | 2.117132 |

### TSVI<sub>t-BuNC</sub>

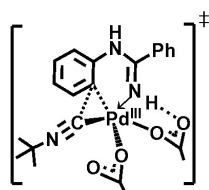

E=-1445.8782202au

|    |           |           |           |
|----|-----------|-----------|-----------|
| Pd | 1.065884  | 0.765518  | -0.110614 |
| H  | -3.231204 | 1.494250  | 1.045567  |
| C  | -3.911572 | 0.994117  | 0.361992  |
| C  | -3.398086 | 0.156268  | -0.641376 |
| C  | -5.287004 | 1.186849  | 0.474244  |
| C  | -1.918780 | -0.025206 | -0.738659 |
| C  | -4.282778 | -0.465272 | -1.536304 |
| C  | -6.163514 | 0.556752  | -0.412980 |
| H  | -5.674164 | 1.833076  | 1.256732  |
| N  | -1.493568 | -1.286414 | -1.129086 |
| N  | -1.081093 | 0.899160  | -0.462243 |
| C  | -5.658468 | -0.264428 | -1.422477 |
| H  | -3.902443 | -1.073129 | -2.353850 |
| H  | -7.235062 | 0.712351  | -0.323622 |
| C  | -0.198872 | -1.728264 | -1.466700 |
| H  | -6.332586 | -0.740300 | -2.129145 |
| C  | -0.113537 | -2.786103 | -2.387355 |

|   |           |           |           |
|---|-----------|-----------|-----------|
| C | 0.995835  | -1.219607 | -0.898779 |
| C | 1.116188  | -3.329951 | -2.746002 |
| H | -1.027195 | -3.172097 | -2.835488 |
| C | 2.231148  | -1.773022 | -1.284909 |
| C | 2.298038  | -2.817297 | -2.202355 |
| H | 1.149347  | -4.147107 | -3.461122 |
| H | 3.135575  | -1.347971 | -0.862173 |
| H | 3.261261  | -3.226055 | -2.493257 |
| H | -1.388124 | 1.805096  | -0.069135 |
| C | 0.853644  | -0.827935 | 0.937417  |
| C | 0.109483  | 3.215561  | 1.485585  |
| O | 1.113174  | 2.460799  | 1.199485  |
| C | 0.480194  | 4.413999  | 2.360889  |
| H | 1.218612  | 4.131591  | 3.116406  |
| H | 0.932938  | 5.187295  | 1.728708  |
| H | -0.413516 | 4.828018  | 2.833812  |
| O | -1.075352 | 3.085833  | 1.115440  |
| O | 1.908218  | 2.073577  | -1.727578 |
| C | 4.236611  | 2.620140  | -2.003021 |
| H | 5.149333  | 2.018283  | -2.005632 |
| H | 3.966632  | 2.911040  | -3.021201 |
| H | 4.433006  | 3.531023  | -1.425027 |
| C | 3.100653  | 1.863250  | -1.347516 |
| O | 3.360607  | 1.049033  | -0.403110 |
| H | -2.232911 | -1.931689 | -1.366253 |
| N | 0.738818  | -1.503430 | 1.906569  |
| C | 0.698179  | -2.756183 | 2.642236  |
| C | 1.834661  | -2.712875 | 3.680156  |
| H | 1.824143  | -3.633066 | 4.273772  |
| H | 2.808316  | -2.627105 | 3.187670  |
| H | 1.712307  | -1.859508 | 4.353724  |
| C | -0.671550 | -2.835009 | 3.340261  |
| H | -0.813805 | -1.983520 | 4.012423  |
| H | -1.483257 | -2.835973 | 2.605541  |
| H | -0.732506 | -3.758018 | 3.926210  |
| C | 0.888811  | -3.928493 | 1.662836  |
| H | 1.848350  | -3.852611 | 1.142552  |
| H | 0.866372  | -4.874455 | 2.214560  |
| H | 0.091944  | -3.946128 | 0.912803  |



### TSVI<sub>t-BuNC</sub>

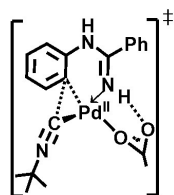

E=-1217.4117557au

|    |           |           |           |
|----|-----------|-----------|-----------|
| C  | 1.188275  | -1.620281 | -0.635624 |
| C  | 0.012355  | -2.341820 | -0.289411 |
| C  | -1.892795 | -0.689295 | -0.201824 |
| H  | 3.098803  | -1.747487 | -1.609809 |
| C  | 2.210210  | -2.303432 | -1.327815 |
| C  | -0.049277 | -3.716811 | -0.564107 |
| C  | 1.006221  | -4.378492 | -1.185195 |
| C  | 2.136625  | -3.665925 | -1.592527 |
| H  | -0.958154 | -4.263991 | -0.322806 |
| H  | 0.930518  | -5.445454 | -1.375766 |
| H  | 2.953588  | -4.169014 | -2.101023 |
| N  | -1.140078 | -1.759965 | 0.298867  |
| N  | -1.471607 | 0.040979  | -1.174899 |
| C  | -3.190204 | -0.476637 | 0.502643  |
| C  | -4.293281 | 0.011983  | -0.214387 |
| C  | -3.328013 | -0.736005 | 1.876046  |
| C  | -5.510004 | 0.229685  | 0.428134  |
| H  | -4.194309 | 0.208123  | -1.277529 |
| C  | -4.546521 | -0.511680 | 2.516850  |
| H  | -2.471010 | -1.075059 | 2.451246  |
| C  | -5.640700 | -0.032733 | 1.794261  |
| H  | -6.357641 | 0.603227  | -0.139200 |
| H  | -4.636794 | -0.701478 | 3.582797  |
| H  | -6.589858 | 0.140331  | 2.293844  |
| H  | -1.711395 | -2.436411 | 0.789271  |
| Pd | 0.678392  | 0.404690  | -0.980403 |
| C  | 1.969111  | -0.257392 | 0.209924  |
| N  | 2.666290  | -0.340938 | 1.200030  |
| O  | -1.520939 | 2.792694  | -1.389469 |
| C  | -0.357885 | 3.206260  | -1.272306 |
| C  | -0.076774 | 4.708260  | -1.353621 |

|   |           |           |           |
|---|-----------|-----------|-----------|
| O | 0.716011  | 2.501765  | -1.087656 |
| H | 0.557620  | 4.917517  | -2.222269 |
| H | -1.011518 | 5.265872  | -1.441400 |
| H | 0.472900  | 5.038232  | -0.465696 |
| H | -1.960398 | 0.932566  | -1.318131 |
| C | 3.395541  | 0.675327  | 1.987920  |
| C | 2.486844  | 1.055495  | 3.171136  |
| H | 3.004910  | 1.768654  | 3.822037  |
| H | 1.562500  | 1.519986  | 2.813191  |
| H | 2.227051  | 0.171455  | 3.762707  |
| C | 4.688363  | 0.016954  | 2.494559  |
| H | 4.464024  | -0.873327 | 3.091211  |
| H | 5.325956  | -0.283716 | 1.656270  |
| H | 5.250176  | 0.721780  | 3.117256  |
| C | 3.709794  | 1.910158  | 1.124072  |
| H | 2.796049  | 2.360720  | 0.723748  |
| H | 4.240011  | 2.657105  | 1.726345  |
| H | 4.350835  | 1.636705  | 0.278896  |

### TSII<sub>CO</sub>

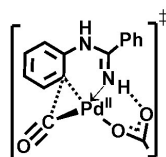

E= -1080.05262au

|    |           |           |           |
|----|-----------|-----------|-----------|
| Pd | 1.161759  | 1.004664  | -0.145233 |
| H  | -2.905629 | 0.963069  | 0.022008  |
| C  | -3.325383 | -0.038958 | 0.078551  |
| C  | -2.487584 | -1.153474 | -0.093978 |
| C  | -4.682395 | -0.226179 | 0.337452  |
| C  | -1.038996 | -0.923641 | -0.366396 |
| C  | -3.029394 | -2.445628 | -0.014446 |
| C  | -5.217471 | -1.514481 | 0.416634  |
| H  | -5.322844 | 0.639394  | 0.480922  |
| N  | -0.168875 | -1.774854 | 0.313410  |
| N  | -0.588695 | 0.014269  | -1.127644 |
| C  | -4.389971 | -2.624261 | 0.235171  |
| H  | -2.401559 | -3.317106 | -0.186921 |

|   |           |           |           |   |           |           |           |
|---|-----------|-----------|-----------|---|-----------|-----------|-----------|
| H | -6.276593 | -1.653590 | 0.615276  | C | -4.122607 | -1.238740 | -0.673374 |
| C | 1.220846  | -1.928103 | 0.064927  | C | -5.915575 | 0.353119  | -0.358756 |
| H | -0.613371 | -2.551639 | 0.782534  | H | -5.310568 | 2.333453  | 0.244639  |
| H | -4.803109 | -3.628050 | 0.280210  | N | -1.451411 | -1.912295 | -0.202962 |
| C | 1.667794  | -3.160882 | -0.427047 | N | -0.818728 | 0.343912  | -0.552258 |
| C | 2.169412  | -0.891388 | 0.276719  | C | -5.480787 | -0.934063 | -0.687382 |
| C | 3.013361  | -3.375080 | -0.719749 | H | -3.772796 | -2.235082 | -0.917385 |
| H | 0.940113  | -3.946145 | -0.614629 | H | -6.976144 | 0.590219  | -0.368364 |
| C | 3.515524  | -1.110516 | -0.079660 | C | -0.193217 | -2.415970 | -0.063272 |
| C | 3.940928  | -2.341649 | -0.565661 | H | -6.201720 | -1.702174 | -0.954236 |
| H | 3.331501  | -4.343909 | -1.094229 | C | -0.083886 | -3.834163 | -0.184031 |
| H | 4.232050  | -0.309507 | 0.075098  | C | 1.018036  | -1.723340 | 0.235512  |
| H | 4.986429  | -2.498027 | -0.812999 | C | 1.118978  | -4.490080 | -0.029910 |
| H | -1.307106 | 0.652104  | -1.463852 | H | -0.999874 | -4.370954 | -0.408951 |
| C | 2.021780  | 0.369460  | 1.366978  | C | 2.236749  | -2.395930 | 0.429418  |
| C | -0.526401 | 3.401981  | -0.318977 | C | 2.291015  | -3.773642 | 0.285632  |
| O | 0.672013  | 3.020073  | 0.007402  | H | 1.160094  | -5.570366 | -0.138913 |
| C | -0.727539 | 4.909374  | -0.167547 | H | 3.127520  | -1.829274 | 0.674813  |
| H | -1.736399 | 5.190281  | -0.476636 | H | 3.234008  | -4.294477 | 0.423527  |
| H | -0.564397 | 5.202820  | 0.875172  | H | -1.131230 | 1.323030  | -0.429571 |
| H | 0.009837  | 5.447061  | -0.772922 | C | 0.581911  | -0.315926 | 1.859410  |
| O | -1.454100 | 2.683135  | -0.716697 | C | 0.243926  | 3.288277  | 0.301047  |
| O | 2.225345  | 0.369713  | 2.525985  | O | 1.229712  | 2.448800  | 0.344926  |

### TSVII<sub>CO</sub>

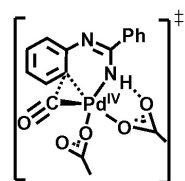

E= -1307.883348au

|    |           |           |           |   |          |          |           |
|----|-----------|-----------|-----------|---|----------|----------|-----------|
| Pd | 1.074750  | 0.345258  | 0.148818  | H | 4.594484 | 0.769554 | -2.748341 |
| H  | -2.913698 | 1.815935  | 0.264476  | H | 4.826722 | 2.052838 | -1.538501 |
| C  | -3.617487 | 1.037075  | -0.010598 | C | 3.299641 | 0.660336 | -1.046189 |
| C  | -3.176683 | -0.255771 | -0.338387 | O | 3.233499 | 0.454941 | 0.222053  |
| C  | -4.981376 | 1.331945  | -0.017965 |   |          |          |           |
| C  | -1.724129 | -0.625827 | -0.331857 |   |          |          |           |

### TSVIII<sub>CO</sub>

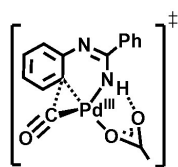

E= -1079.4082468au

|    |           |           |           |
|----|-----------|-----------|-----------|
| Pd | 1.179788  | 1.017019  | -0.082736 |
| H  | -2.933596 | 0.931554  | 0.016538  |
| C  | -3.306899 | -0.088130 | 0.052056  |
| C  | -2.439026 | -1.177339 | -0.136577 |
| C  | -4.658097 | -0.309581 | 0.316185  |
| C  | -0.985954 | -0.959633 | -0.410307 |
| C  | -2.947743 | -2.483293 | -0.049112 |
| C  | -5.159940 | -1.610559 | 0.388949  |
| H  | -5.318369 | 0.539647  | 0.467995  |
| N  | -0.183728 | -2.013460 | -0.175474 |
| N  | -0.551469 | 0.180564  | -0.940169 |
| C  | -4.300339 | -2.696738 | 0.205661  |
| H  | -2.270485 | -3.318106 | -0.187708 |
| H  | -6.214793 | -1.777672 | 0.590024  |
| C  | 1.168910  | -1.987463 | -0.172916 |
| H  | -4.684201 | -3.711818 | 0.261575  |
| C  | 1.804130  | -3.218524 | -0.515708 |
| C  | 2.035400  | -0.871331 | 0.121153  |
| C  | 3.173942  | -3.316489 | -0.660260 |
| H  | 1.154646  | -4.066735 | -0.705559 |
| C  | 3.432837  | -1.002539 | -0.021012 |
| C  | 4.001478  | -2.201179 | -0.427260 |
| H  | 3.616718  | -4.264756 | -0.951740 |
| H  | 4.069329  | -0.156811 | 0.224463  |
| H  | 5.078657  | -2.283110 | -0.535040 |
| H  | -1.244218 | 0.934370  | -1.025144 |
| C  | 1.754667  | 0.244500  | 1.549515  |
| C  | -0.521019 | 3.465158  | -0.326293 |
| O  | 0.670075  | 3.021555  | -0.049905 |
| C  | -0.630148 | 4.983419  | -0.235246 |
| H  | -1.634823 | 5.307383  | -0.512822 |
| H  | -0.404470 | 5.310383  | 0.785580  |
| H  | 0.108103  | 5.450815  | -0.895241 |

0 -1.507400 2.782815 -0.636552

0 1.714882 0.011953 2.687644

### TSVII<sub>t-BuNC</sub>

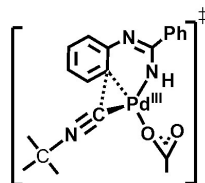

E= -1216.7754238au

|    |           |           |           |
|----|-----------|-----------|-----------|
| C  | -1.098414 | -1.132043 | 0.898978  |
| C  | 0.093740  | -1.152657 | 1.690751  |
| C  | 1.262361  | 0.771935  | 0.914126  |
| H  | -3.042608 | -1.992297 | 0.528861  |
| C  | -2.163707 | -2.011523 | 1.167808  |
| C  | 0.134619  | -2.103893 | 2.747959  |
| C  | -0.935269 | -2.937050 | 3.024381  |
| C  | -2.097939 | -2.898749 | 2.233865  |
| H  | 1.040068  | -2.134371 | 3.346293  |
| H  | -0.870136 | -3.634916 | 3.855079  |
| H  | -2.930216 | -3.564219 | 2.443387  |
| N  | 1.235882  | -0.426679 | 1.486792  |
| N  | 0.180798  | 1.525171  | 0.686272  |
| C  | 2.630872  | 1.308257  | 0.610727  |
| C  | 2.842886  | 2.201989  | -0.450060 |
| C  | 3.728616  | 0.906562  | 1.387399  |
| C  | 4.121601  | 2.688211  | -0.724317 |
| H  | 2.013905  | 2.500592  | -1.087055 |
| C  | 5.002875  | 1.402704  | 1.120508  |
| H  | 3.559755  | 0.206043  | 2.197592  |
| C  | 5.204479  | 2.295373  | 0.063973  |
| H  | 4.270279  | 3.371236  | -1.556301 |
| H  | 5.841675  | 1.092768  | 1.738309  |
| H  | 6.199328  | 2.679650  | -0.144857 |
| Pd | -1.587814 | 0.556276  | -0.193495 |
| C  | -0.674821 | -0.939489 | -0.958220 |
| N  | -0.038324 | -1.592725 | -1.714246 |
| C  | 0.798162  | -2.727821 | -2.082831 |
| C  | 2.258771  | -2.305039 | -1.833574 |
| H  | 2.924461  | -3.136406 | -2.088850 |

|   |           |           |           |   |           |           |           |
|---|-----------|-----------|-----------|---|-----------|-----------|-----------|
| H | 2.524878  | -1.443576 | -2.453790 | H | 6.764827  | -0.252416 | -1.558177 |
| H | 2.412982  | -2.037321 | -0.783814 | C | 0.005942  | 2.518496  | -0.129157 |
| C | 0.411614  | -3.929134 | -1.200682 | H | 5.974814  | 2.093082  | -1.809662 |
| H | 0.563688  | -3.703227 | -0.141216 | C | -0.169245 | 3.914912  | 0.092885  |
| H | -0.637438 | -4.202910 | -1.351746 | C | -1.136471 | 1.695632  | 0.111226  |
| H | 1.034659  | -4.789834 | -1.466469 | C | -1.372238 | 4.440648  | 0.517636  |
| C | 0.558159  | -3.031076 | -3.570663 | H | 0.693798  | 4.547724  | -0.088872 |
| H | 0.802467  | -2.161909 | -4.189044 | C | -2.348205 | 2.231700  | 0.586289  |
| H | 1.191086  | -3.868823 | -3.880917 | C | -2.472121 | 3.597924  | 0.776799  |
| H | -0.487146 | -3.301823 | -3.751363 | H | -1.467117 | 5.512927  | 0.667299  |
| O | -2.211754 | 2.272285  | -1.384289 | H | -3.179727 | 1.563818  | 0.779868  |
| C | -3.021031 | 2.684683  | -0.476852 | H | -3.412956 | 4.013806  | 1.125886  |
| C | -3.806768 | 3.951333  | -0.735799 | C | -0.498292 | 0.023422  | 1.198730  |
| O | -3.154973 | 2.045887  | 0.603322  | C | -0.165884 | -3.034788 | -0.478655 |
| H | -3.117784 | 4.777751  | -0.940397 | O | -1.026821 | -2.303356 | -1.112800 |
| H | -4.431180 | 3.821179  | -1.626290 | C | -0.260819 | -4.520106 | -0.821000 |
| H | -4.434809 | 4.196664  | 0.122506  | H | -0.314613 | -4.659605 | -1.904779 |
| H | 0.392008  | 2.395875  | 0.201989  | H | 0.595754  | -5.059879 | -0.411878 |

### TSVII<sup>†</sup><sub>t-BuNC</sub>

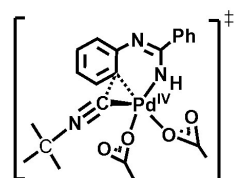

E= -1445.2611307au

|    |           |           |           |   |           |           |           |
|----|-----------|-----------|-----------|---|-----------|-----------|-----------|
| Pd | -1.159627 | -0.250944 | -0.584827 | O | 0.673230  | -2.625864 | 0.341751  |
| H  | 2.745162  | -1.518562 | -0.710400 | O | -2.747906 | -0.177746 | -2.292001 |
| C  | 3.441771  | -0.729409 | -0.984801 | C | -5.015160 | -0.814998 | -1.738650 |
| C  | 2.991904  | 0.592587  | -1.132227 | H | -5.681429 | -0.465419 | -0.945260 |
| C  | 4.797366  | -1.027054 | -1.132929 | H | -5.289928 | -0.366036 | -2.695636 |
| C  | 1.545205  | 0.935827  | -0.968291 | H | -5.124363 | -1.903029 | -1.816689 |
| C  | 3.917279  | 1.607362  | -1.418194 | C | -3.580029 | -0.494007 | -1.409576 |
| C  | 5.711032  | -0.016271 | -1.436155 | O | -3.205245 | -0.579306 | -0.170734 |
| H  | 5.138405  | -2.050865 | -1.005340 | N | -0.062704 | -0.124738 | 2.271112  |
| N  | 1.268735  | 2.124482  | -0.474240 | C | 0.600746  | -0.706379 | 3.430966  |
| N  | 0.634820  | 0.047663  | -1.412581 | C | -0.053258 | -2.077479 | 3.684396  |
| C  | 5.267091  | 1.302014  | -1.576342 | H | 0.438215  | -2.553910 | 4.539385  |
| H  | 3.559142  | 2.626650  | -1.513441 | H | -1.117861 | -1.966188 | 3.915111  |
|    |           |           |           | H | 0.060543  | -2.712312 | 2.801680  |
|    |           |           |           | C | 2.085581  | -0.866024 | 3.055444  |
|    |           |           |           | H | 2.184337  | -1.527568 | 2.191352  |
|    |           |           |           | H | 2.536637  | 0.102943  | 2.819492  |
|    |           |           |           | H | 2.621060  | -1.301397 | 3.905743  |
|    |           |           |           | C | 0.413135  | 0.247270  | 4.620876  |
|    |           |           |           | H | -0.648151 | 0.384350  | 4.851565  |

|   |          |           |           |
|---|----------|-----------|-----------|
| H | 0.906257 | -0.175137 | 5.502033  |
| H | 0.855285 | 1.226675  | 4.412704  |
| H | 1.024202 | -0.854751 | -1.670410 |
